# Supplementary material for: Generalized-active-space pair-density functional theory: an efficient method to study large, strongly correlated, conjugated systems
Source: PubMed Central journal article supplement (PMC5433034; doi:10.1039/c6sc05036k), 2017-01-19
Supplement: SC-008-C6SC05036K-s001.pdf [file SC-008-C6SC05036K-s001.pdf]

ELECTRONIC SUPPLEMENTARY INFORMATION

DECEMBER 25, 2016

# Generalized-Active-Space Pair-Density Functional Theory: An Efficient Method to Study Large, Strongly Correlated, Conjugated Systems

Soumen Ghosh, Christopher J. Cramer\*, Donald G. Truhlar\*, Laura Gagliardi\*

Department of Chemistry, Chemical Theory Center, and Supercomputing Institute, University of Minnesota, 207 Pleasant Street SE, Minneapolis, MN 55455-0431, USA.

E-mail: [gagliardi@umn.edu](mailto:gagliardi@umn.edu); [cramer@umn.edu](mailto:cramer@umn.edu); [truhlar@umn.edu](mailto:truhlar@umn.edu)

## Contents

|                                                                                                          |      |
|----------------------------------------------------------------------------------------------------------|------|
| Table S1. Singlet-triplet energy gaps (kcal/mol) for CAS(4,4) active space                               | S-2  |
| Table S2. Singlet-triplet energy gaps (kcal/mol) for CAS(8,8) active space                               | S-3  |
| Table S3. Number of CSFs for CASSCF and GASSCF calculations                                              | S-4  |
| Table S4. Singlet-triplet energy gaps (kcal/mol) DFP-1 partitions                                        | S-5  |
| Table S5. Singlet-triplet energy gaps (kcal/mol) for WFP-1 partitions                                    | S-6  |
| Figure S1. Occupation numbers for HONO-1, HONO, LUNO and LUNO+1 for<br>(i) FP-1 and (ii) DFP-1           | S-7  |
| Table S6. Singlet-triplet energy gaps (kcal/mol) for KS-DFT                                              | S-8  |
| Table S7. Singlet-triplet energy gap (kcal/mol) of decacene for DFP-1 partition with<br>other geometries | S-9  |
| Table S8. Singlet-triplet energy gap (kcal/mol) of hexacene using different on-top<br>functionals        | S-9  |
| Molecular geometries in Å                                                                                | S-10 |
| Absolute energies in hartrees                                                                            | S-27 |

Table S1. Singlet-triplet energy gaps (kcal/mol) for CAS(4,4) active space

| Acene            | CASSCF   |           | CASPT2   |           | tPBE<br>(CAS-PDFT) |           | Literature values <sup>a</sup> |                        |
|------------------|----------|-----------|----------|-----------|--------------------|-----------|--------------------------------|------------------------|
|                  | Vertical | Adiabatic | Vertical | Adiabatic | Vertical           | Adiabatic | Vertical <sup>b</sup>          | Adiabatic <sup>c</sup> |
| Naphthalene      | 93.7     | 80.4      | 75.5     | 67.9      | 70.7               | 62.6      | 76.0                           | 64.4                   |
| Anthracene       | 69.7     | 59.5      | 60.3     | 51.9      | 55.9               | 47.8      | 56.8                           | 46.2                   |
| Tetracene        | 52.5     | 45.8      | 41.3     | 34.8      | 33.9               | 28.1      | 40.4                           | 34.1                   |
| Pentacene        | 32.8     | 25.5      | 30.6     | 25.5      | 25.5               | 21.2      | 31.3                           | 24.3                   |
| Hexacene         | 29.3     | 23.4      | 26.2     | 22.3      | 22.2               | 18.9      | 22.8                           | 18.7                   |
| Heptacene        | 11.3     | 8.7       | 16.7     | 15.4      | 11.9               | 10.9      | 18.1                           | 13.9                   |
| Octacene         | 16.3     | 14.0      | 15.4     | 14.9      | 10.2               | 10.1      | 13.4                           | 11.5                   |
| Nonacene         | 12.6     | 10.9      | 9.9      | 9.8       | 2.9                | 2.9       | 10.7                           | 10.4                   |
| Decacene         | 11.9     | 9.3       | 10.5     | 10.6      | 4.6                | 5.2       | 8.1                            | 9.0                    |
| Undecacene       | 9.6      | 6.9       | 7.5      | 7.6       | 0.8                | 1.3       | 7.1                            | 9.4                    |
| Dodecacene       | 8.2      | 3.4       | 4.4      | 10.8      | -5.3               | 4.9       | NA <sup>e</sup>                | 8.9                    |
| MUD <sup>d</sup> | 6.9      | 5.8       | 1.6      | 2.3       | 4.6                | 3.7       |                                |                        |

Geometries are optimized using B3LYP/6-31G(d,p) level of theory. CASSCF, CASPT2 and tPBE calculations are performed using 6-31+G(d,p) basis set. <sup>a</sup>Highest-level available literature estimates. <sup>b</sup>CCSD(T)/cc-pV $\infty$ Z from ref 1. <sup>c</sup>Average adiabatic gaps from Table 1. <sup>d</sup>Mean unsigned deviation. <sup>e</sup>Not available. For vertical excitations MUD is calculated for the values from naphthalene to undecacene only.

Table S2. Singlet-triplet energy gaps (kcal/mol) for CAS(8,8) active space

| Acene            | CASSCF   |           | CASPT2   |           | tPBE<br>(CAS-PDFT) |           | Literature values <sup>a</sup> |                        |
|------------------|----------|-----------|----------|-----------|--------------------|-----------|--------------------------------|------------------------|
|                  | Vertical | Adiabatic | Vertical | Adiabatic | Vertical           | Adiabatic | Vertical <sup>b</sup>          | Adiabatic <sup>c</sup> |
| Napthalene       | 75.6     | 67.2      | 74.3     | 65.8      | 76.0               | 66.1      | 76.0                           | 64.4                   |
| Anthracene       | 61.5     | 51.0      | 54.0     | 47.3      | 51.9               | 46.0      | 56.8                           | 46.2                   |
| Tetracene        | 38.9     | 28.5      | 43.4     | 37.3      | 42.5               | 37.4      | 40.4                           | 34.1                   |
| Pentacene        | 40.1     | 33.8      | 28.4     | 22.9      | 23.6               | 18.3      | 31.3                           | 24.3                   |
| Hexacene         | 17.1     | 10.1      | 28.4     | 24.6      | 26.4               | 23.6      | 22.8                           | 18.7                   |
| Heptacene        | 7.2      | 4.0       | 18.1     | 16.5      | 18.4               | 17.4      | 18.1                           | 13.9                   |
| Octacene         | 13.0     | 11.4      | 11.2     | 10.5      | 7.6                | 7.3       | 13.4                           | 11.5                   |
| Nonacene         | 11.7     | 9.7       | 9.8      | 9.5       | 6.8                | 6.8       | 10.7                           | 10.4                   |
| Decacene         | 9.8      | 7.6       | 11.6     | 11.8      | 6.9                | 7.2       | 8.1                            | 9.0                    |
| Undecacene       | 13.8     | 10.4      | 7.6      | 7.1       | 0.9                | 1.1       | 7.1                            | 9.4                    |
| Dodecacene       | 11.0     | 6.7       | 3.4      | 10.7      | -5.4               | 5.3       | NA <sup>e</sup>                | 8.9                    |
| MUD <sup>d</sup> | 4.2      | 4.2       | 2.3      | 2.2       | 3.6                | 3.7       |                                |                        |

Geometries are optimized using B3LYP/6-31G(d,p) level of theory. CASSCF, CASPT2 and tPBE calculations are performed using 6-31+G(d,p) basis set. <sup>a</sup>Highest-level available literature estimates. <sup>b</sup>CCSD(T)/cc-pV $\infty$ Z from ref 1. <sup>c</sup>Average adiabatic gaps from Table 1. <sup>d</sup>Mean unsigned deviation. <sup>e</sup>Not available. For vertical excitations MUD is calculated for the values from naphthalene to undecacene only.

Table S3. Number of CSFs for CASSCF and GASSCF calculations with the valence  $\pi$  active space (this table is like Table 3 in the article proper, but it has the full number of digits.)

| Molecule   | CASSCF         |         | FP-1    |         | DFP-1   |         | WFP-1   |         | WFP-3   |         |
|------------|----------------|---------|---------|---------|---------|---------|---------|---------|---------|---------|
|            | Singlet        | Triplet | Singlet | Triplet | Singlet | Triplet | Singlet | Triplet | Singlet | Triplet |
| Napthalene | 4956           | 7440    | 182     | 235     | 256     | 369     | 500     | 735     | 866     | 1247    |
| Anthracene | 691335         | 1252720 | 778     | 1134    | 1692    | 2745    | 3424    | 5555    | 4944    | 7843    |
| Tetracene  | $\sim 10^8$    |         | 2382    | 3615    | 6296    | 10641   | 12828   | 21563   | 16846   | 27783   |
| Pentacene  | $\sim 10^{10}$ |         | 5706    | 8898    | 17052   | 29373   | 34832   | 59527   | 43220   | 72703   |
| Hexacene   | $\sim 10^{13}$ |         | 11750   | 18563   | 37928   | 66085   | 77548   | 133943  | 92706   | 157955  |
| Heptacene  | $\sim 10^{15}$ |         | 21666   | 34590   | 73924   | 129737  | 151224  | 262963  | 176080  | 302559  |
| Octacene   | $\sim 10^{17}$ |         | 36878   | 59239   | 131040  | 231117  | 268148  | 468451  | 306158  | 529243  |
| Nonacene   | $\sim 10^{20}$ |         | 58978   | 95250   | 216284  | 382837  | 442672  | 775967  | 497820  | 864431  |
| Decacene   | $\sim 10^{22}$ |         | 89814   | 145563  | 337672  | 599333  | 691212  | 1214767 | 768010  | 1338243 |
| Undecacene | $\sim 10^{24}$ |         | 131418  | 213678  | 504228  | 896865  | 1032248 | 1817803 | 1135736 | 1984495 |
| Dodecacene | $\sim 10^{27}$ |         | 186062  | 303215  | 725984  | 1293517 | 1486324 | 2621723 | 1622070 | 2840699 |

Table S4. Singlet-triplet energy gaps (kcal/mol) for DFP-1 partitions

| Acene            | $(n,m)$ | GASSCF   |           | GASPT2   |           | tPBE<br>(GAS-PDFT) |           | Literature values <sup>a</sup> |                        |
|------------------|---------|----------|-----------|----------|-----------|--------------------|-----------|--------------------------------|------------------------|
|                  |         | Vertical | Adiabatic | Vertical | Adiabatic | Vertical           | Adiabatic | Vertical <sup>b</sup>          | Adiabatic <sup>c</sup> |
| Napthalene       | (10,10) | 70.7     | 62.1      | 75.0     | 66.0      | 76.9               | 62.6      | 76.0                           | 64.4                   |
| Anthracene       | (14,14) | 69.1     | 57.8      | 59.9     | 51.9      | 48.1               | 42.1      | 56.8                           | 46.2                   |
| Tetracene        | (18,18) | 42.5     | 32.8      | 41.6     | 36.5      | 36.8               | 32.9      | 40.4                           | 34.1                   |
| Pentacene        | (22,22) | 37.7     | 29.6      |          |           | 29.9               | 24.9      | 31.3                           | 24.3                   |
| Hexacene         | (26,26) | 22.5     | 15.6      |          |           | 28.4               | 24.8      | 22.8                           | 18.7                   |
| Heptacene        | (30,30) | 21.1     | 17.6      |          |           | 14.0               | 13.0      | 18.1                           | 13.9                   |
| Octacene         | (34,34) | 19.3     | 16.7      |          |           | 12.7               | 12.4      | 13.4                           | 11.5                   |
| Nonacene         | (38,38) | 15.0     | 12.7      |          |           | 6.3                | 6.3       | 10.7                           | 10.4                   |
| Decacene         | (42,42) | 15.0     | 12.2      |          |           | 6.6                | 6.9       | 8.1                            | 9.0                    |
| Undecacene       | (46,46) | 13.2     | 9.9       |          |           | 3.6                | 3.7       | 7.1                            | 9.4                    |
| Dodecacene       | (50,50) | 13.5     | 8.9       |          |           | 4.4                | 4.9       | NA <sup>e</sup>                | 8.9                    |
| MUD <sup>d</sup> |         | 5.3      | 3.5       |          |           | 3.4                | 2.9       |                                |                        |

Geometries are optimized using B3LYP/6-31G(d,p). GASSCF, AGASPT2 and tPBE calculations are performed using the 6-31+G(d,p) basis set. <sup>a</sup>Highest-level available literature estimates. <sup>b</sup>CCSD(T)/cc-pV $\infty$ Z from ref 1. <sup>c</sup>Average adiabatic gaps from Table 1. <sup>d</sup>Mean unsigned deviation. <sup>e</sup>Not available. For vertical excitations MUD is calculated for the values from naphthalene to undecacene only.

Table S5. Singlet-triplet energy gaps (kcal/mol) for WFP-1 partitions

| Molecule         | $(n,m)$ | GASSCF   |           | GASPT2   |           | tPBE<br>(GAS-PDFT) |           | Literature values <sup>a</sup> |                        |
|------------------|---------|----------|-----------|----------|-----------|--------------------|-----------|--------------------------------|------------------------|
|                  |         | Vertical | Adiabatic | Vertical | Adiabatic | Vertical           | Adiabatic | Vertical <sup>b</sup>          | Adiabatic <sup>c</sup> |
| Napthalene       | (10,10) | 72.2     | 64.0      | 76.2     | 67.4      | 77.4               | 63.1      | 76.0                           | 64.4                   |
| Anthracene       | (14,14) | 69.8     | 59.1      | 60.0     | 52.6      | 47.9               | 42.2      | 56.8                           | 46.2                   |
| Tetracene        | (18,18) | 42.0     | 31.9      | 40.9     | 35.9      | 35.8               | 32.6      | 40.4                           | 34.1                   |
| Pentacene        | (22,22) | 45.0     | 37.2      |          |           | 28.4               | 23.3      | 31.3                           | 24.3                   |
| Hexacene         | (26,26) | 31.4     | 24.8      |          |           | 24.3               | 21.1      | 22.8                           | 18.7                   |
| Heptacene        | (30,30) | 24.6     | 21.3      |          |           | 14.9               | 13.8      | 18.1                           | 13.9                   |
| Octacene         | (34,34) | 20.5     | 18.0      |          |           | 13.1               | 13.1      | 13.4                           | 11.5                   |
| Nonacene         | (38,38) | 14.6     | 12.5      |          |           | 6.3                | 6.5       | 10.7                           | 10.4                   |
| Decacene         | (42,42) | 14.9     | 12.3      |          |           | 6.7                | 7.3       | 8.1                            | 9.0                    |
| Undecacene       | (46,46) | 12.4     | 9.4       |          |           | 3.2                | 3.7       | 7.1                            | 9.4                    |
| Dodecacene       | (50,50) | 13.0     | 8.6       |          |           | 4.0                | 4.9       | NA <sup>e</sup>                | 8.9                    |
| MUD <sup>d</sup> |         | 7.0      | 4.9       |          |           | 3.3                | 2.5       |                                |                        |

Geometries are optimized using B3LYP/6-31G(d,p). GASSCF, AGASPT2 and tPBE calculations are performed using the 6-31+G(d,p) basis set. <sup>a</sup>Highest-level available literature estimates. <sup>b</sup>CCSD(T)/cc-pV $\infty$ Z from ref 1. <sup>c</sup>Average adiabatic gaps from Table 1. <sup>d</sup>Mean unsigned deviation. <sup>e</sup>Not available. For vertical excitations MUD is calculated for the values from naphthalene to undecacene only.

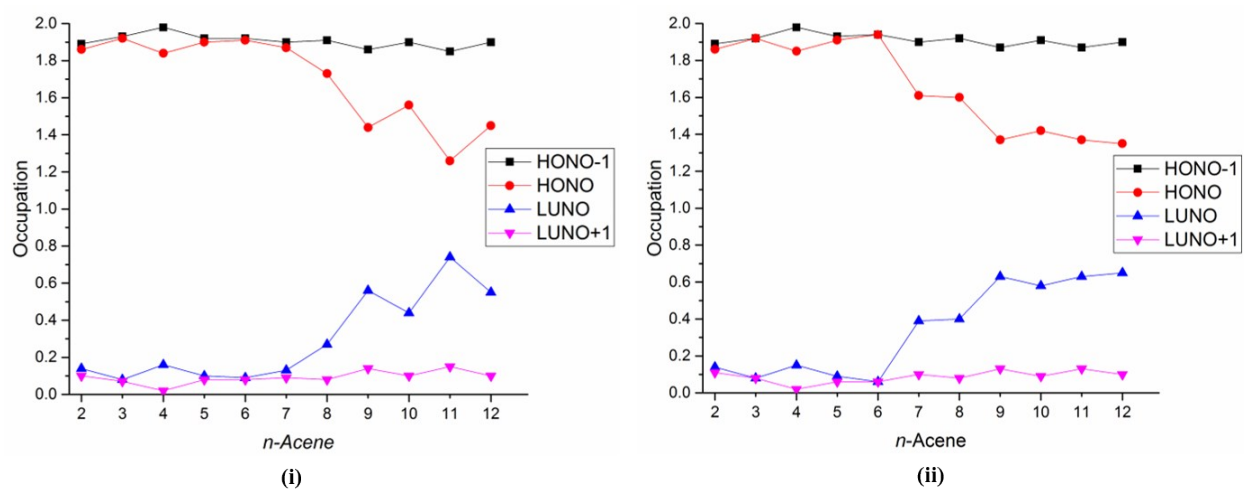

**Figure S1.** Occupation number for HONO-1, HONO, LUNO and LUNO+1 for (i) DFP-1 and (ii) WFP-1

Table S6. Singlet-triplet energy gaps (kcal/mol) for KS-DFT

| Acene            | PBE      |           | PBE0     |           | B3LYP    |           | Literature values <sup>a</sup> |                        |
|------------------|----------|-----------|----------|-----------|----------|-----------|--------------------------------|------------------------|
|                  | (KS-DFT) |           | (KS-DFT) |           | (KS-DFT) |           |                                |                        |
|                  | Vertical | Adiabatic | Vertical | Adiabatic | Vertical | Adiabatic | Vertical <sup>b</sup>          | Adiabatic <sup>c</sup> |
| Napthalene       | 78.2     | 60.4      | 71.7     | 62.1      | 71.9     | 62.1      | 76.0                           | 64.4                   |
| Anthracene       | 46.7     | 40.0      | 48.6     | 41.1      | 49.0     | 41.5      | 56.8                           | 46.2                   |
| Tetracene        | 31.8     | 26.5      | 33.1     | 26.9      | 33.6     | 27.6      | 40.4                           | 34.1                   |
| Pentacene        | 21.6     | 17.2      | 22.3     | 16.9      | 22.9     | 17.9      | 31.3                           | 24.3                   |
| Hexacene         | 13.4     | 10.6      | 14.4     | 10.7      | 14.3     | 10.9      | 22.8                           | 18.7                   |
| Heptacene        | 6.3      | 5.6       | 9.4      | 8.0       | 8.4      | 7.2       | 18.1                           | 13.9                   |
| Octacene         | 2.9      | 2.9       | 7.7      | 7.1       | 6.1      | 5.6       | 13.4                           | 11.5                   |
| Nonacene         | 1.6      | 1.9       | 7.5      | 7.1       | 5.4      | 5.1       | 10.7                           | 10.4                   |
| Decacene         | 1.3      | 1.7       | 8.2      | 7.8       | 5.5      | 5.3       | 8.1                            | 9.0                    |
| Undecacene       | 1.6      | 2.1       | 9.5      | 9.0       | 6.2      | 6.0       | 7.1                            | 9.4                    |
| Dodecacene       | 2.2      | 2.7       | 11.3     | 10.5      | 7.4      | 6.9       | NA <sup>e</sup>                | 8.9                    |
| MUD <sup>d</sup> | 8.4      | 7.2       | 5.7      | 4.3       | 6.1      | 5.0       |                                |                        |

Geometries are optimized using B3LYP/6-31G(d,p). KS-DFT singlet-triplet energies are calculated using the 6-31+G(d,p) basis set. <sup>a</sup>Highest-level available literature estimates. <sup>b</sup>CCSD(T)/cc-pV $\infty$ Z from ref 1. <sup>c</sup>Average adiabatic gaps from Table 1. <sup>d</sup>Mean unsigned deviation. <sup>e</sup>Not available. For vertical excitations MUD is calculated for the values from naphthalene to undecacene only.



Table S7. Singlet-triplet energy gap (kcal/mol) of decacene for DFP-1 partition with other geometries

| Decacene<br>geomtery <sup>a</sup> | GASSCF   |           | tPBE<br>(MC-PDFT) |           | References            |                        |
|-----------------------------------|----------|-----------|-------------------|-----------|-----------------------|------------------------|
|                                   | Vertical | Adiabatic | Vertical          | Adiabatic | Vertical <sup>b</sup> | Adiabatic <sup>c</sup> |
| M06-L                             | 15.0     | 13.6      | 6.5               | 6.7       | 8.1                   | 9.0                    |
| <S <sup>2</sup> > = 1.27          |          |           |                   |           |                       |                        |
| M06                               | 15.0     | 11.3      | 6.5               | 7.1       |                       |                        |
| <S <sup>2</sup> > = 1.58          |          |           |                   |           |                       |                        |

GASSCF and tPBE calculations are performed using the 6-31+G(d,p) basis set. <sup>a</sup>Decacene geometries are calculated using indicated exchange-correlation functionals and the 6-31G(d,p) basis set. <S<sup>2</sup>> values are for optimized singlet geometries. <sup>b</sup>CCSD(T)/cc-pV $\infty$ Z from ref 1. <sup>c</sup>v2RDM/cc-pV $\infty$ Z from ref 2.

Table S8. Singlet-triplet energy gap (kcal/mol) of hexacene using various on-top functionals.

| Active<br>space | tPBE     |           | ftPBE    |           | tBLYP    |           | ftBLYP   |           | Literature            |                        |
|-----------------|----------|-----------|----------|-----------|----------|-----------|----------|-----------|-----------------------|------------------------|
|                 | Vertical | Adiabatic | Vertical | Adiabatic | Vertical | Adiabatic | Vertical | Adiabatic | Vertical <sup>a</sup> | Adiabatic <sup>b</sup> |
| CAS(2,2)        | 19.7     | 16.8      | 20.5     | 17.6      | 19.7     | 16.8      | 20.7     | 17.9      | 22.8                  | 17.6                   |
| CAS(4,4)        | 22.2     | 18.9      | 22.4     | 19.1      | 22.2     | 18.9      | 22.6     | 19.4      |                       |                        |
| CAS(8,8)        | 26.4     | 23.6      | 24.4     | 21.3      | 26.4     | 23.6      | 25.1     | 22.1      |                       |                        |
| FP-1            | 22.9     | 19.7      | 22.6     | 19.4      | 22.9     | 19.8      | 22.9     | 19.8      |                       |                        |
| DFP-1           | 28.4     | 24.8      | 27.9     | 24.4      | 28.4     | 24.8      | 28.5     | 25.0      |                       |                        |
| WFP-1           | 24.3     | 21.1      | 24.2     | 20.9      | 24.3     | 21.1      | 24.5     | 21.3      |                       |                        |
| WFP-3           | 17.3     | 15.0      | 17.3     | 14.9      | 17.3     | 15.1      | 17.5     | 15.2      |                       |                        |

Geometries are optimized using UB3LYP/6-31G(d,p) level of theory. GASSCF and tPBE calculations are performed using 6-31+G(d,p) basis set. <sup>a</sup>CCSD(T)/cc-pV $\infty$ Z from ref 1. <sup>b</sup>Average adiabatic gap from table 1.

## Molecular geometries in Å

### Singlet Geometries (B3LYP/6-31G\*\*)

#### Napthalene

|   |              |              |             |
|---|--------------|--------------|-------------|
| C | -1.244593000 | 1.402439000  | 0.000000000 |
| C | -2.433051000 | 0.708272000  | 0.000000000 |
| C | -2.433051000 | -0.708272000 | 0.000000000 |
| C | -1.244593000 | -1.402439000 | 0.000000000 |
| C | 0.000000000  | -0.716921000 | 0.000000000 |
| C | 0.000000000  | 0.716921000  | 0.000000000 |
| H | -1.242226000 | 2.489450000  | 0.000000000 |
| H | -3.377109000 | 1.245176000  | 0.000000000 |
| H | -3.377109000 | -1.245176000 | 0.000000000 |
| H | -1.242226000 | -2.489450000 | 0.000000000 |
| C | 1.244593000  | 1.402439000  | 0.000000000 |
| C | 2.433051000  | 0.708272000  | 0.000000000 |
| H | 3.377109000  | 1.245176000  | 0.000000000 |
| C | 2.433051000  | -0.708272000 | 0.000000000 |
| H | 3.377109000  | -1.245176000 | 0.000000000 |
| C | 1.244593000  | -1.402439000 | 0.000000000 |
| H | 1.242226000  | -2.489450000 | 0.000000000 |
| H | 1.242226000  | 2.489450000  | 0.000000000 |

#### Anthracene

|   |              |              |             |
|---|--------------|--------------|-------------|
| C | 0.000000000  | 1.403683000  | 0.000000000 |
| C | -1.223603000 | 0.722675000  | 0.000000000 |
| C | -1.223603000 | -0.722675000 | 0.000000000 |
| C | 0.000000000  | -1.403683000 | 0.000000000 |
| C | 1.223603000  | -0.722675000 | 0.000000000 |
| C | 1.223603000  | 0.722675000  | 0.000000000 |
| H | 0.000000000  | 2.491422000  | 0.000000000 |
| H | 0.000000000  | -2.491422000 | 0.000000000 |
| C | 2.478998000  | 1.406917000  | 0.000000000 |
| C | 3.659824000  | 0.712921000  | 0.000000000 |
| H | 4.605674000  | 1.246544000  | 0.000000000 |
| C | 3.659824000  | -0.712921000 | 0.000000000 |
| H | 4.605674000  | -1.246544000 | 0.000000000 |
| C | 2.478998000  | -1.406917000 | 0.000000000 |
| H | 2.476980000  | -2.493805000 | 0.000000000 |
| H | 2.476980000  | 2.493805000  | 0.000000000 |
| C | -2.478998000 | 1.406917000  | 0.000000000 |
| C | -3.659824000 | 0.712921000  | 0.000000000 |
| H | -4.605674000 | 1.246544000  | 0.000000000 |
| C | -3.659824000 | -0.712921000 | 0.000000000 |
| H | -4.605674000 | -1.246544000 | 0.000000000 |
| C | -2.478998000 | -1.406917000 | 0.000000000 |
| H | -2.476980000 | -2.493805000 | 0.000000000 |
| H | -2.476980000 | 2.493805000  | 0.000000000 |

#### Tetracene

|   |              |              |             |
|---|--------------|--------------|-------------|
| C | -1.235102000 | 1.406546000  | 0.000000000 |
| C | -2.450052000 | 0.725940000  | 0.000000000 |
| C | -2.450052000 | -0.725940000 | 0.000000000 |
| C | -1.235102000 | -1.406546000 | 0.000000000 |
| C | 0.000000000  | -0.726320000 | 0.000000000 |
| C | 0.000000000  | 0.726320000  | 0.000000000 |
| H | -1.235274000 | 2.494145000  | 0.000000000 |
| H | -1.235274000 | -2.494145000 | 0.000000000 |
| C | 1.235102000  | 1.406546000  | 0.000000000 |
| C | 2.450052000  | 0.725940000  | 0.000000000 |
| C | 2.450052000  | -0.725940000 | 0.000000000 |
| C | 1.235102000  | -1.406546000 | 0.000000000 |
| H | 1.235274000  | -2.494145000 | 0.000000000 |
| H | 1.235274000  | 2.494145000  | 0.000000000 |
| C | -3.710418000 | 1.409129000  | 0.000000000 |
| C | -4.887920000 | 0.715140000  | 0.000000000 |
| H | -5.834602000 | 1.247232000  | 0.000000000 |
| C | -4.887920000 | -0.715140000 | 0.000000000 |
| H | -5.834602000 | -1.247232000 | 0.000000000 |
| C | -3.710418000 | -1.409129000 | 0.000000000 |
| H | -3.708863000 | -2.495980000 | 0.000000000 |
| H | -3.708863000 | 2.495980000  | 0.000000000 |
| C | 3.710418000  | 1.409129000  | 0.000000000 |
| C | 4.887920000  | 0.715140000  | 0.000000000 |
| H | 5.834602000  | 1.247232000  | 0.000000000 |
| C | 4.887920000  | -0.715140000 | 0.000000000 |
| H | 5.834602000  | -1.247232000 | 0.000000000 |
| C | 3.710418000  | -1.409129000 | 0.000000000 |
| H | 3.708863000  | -2.495980000 | 0.000000000 |
| H | 3.708863000  | 2.495980000  | 0.000000000 |

## Pentacene

|   |              |              |             |
|---|--------------|--------------|-------------|
| C | -2.467115000 | 1.408070000  | 0.000000000 |
| C | -3.677901000 | 0.727630000  | 0.000000000 |
| C | -3.677901000 | -0.727630000 | 0.000000000 |
| C | -2.467115000 | -1.408070000 | 0.000000000 |
| C | -1.226237000 | -0.728620000 | 0.000000000 |
| C | -1.226237000 | 0.728620000  | 0.000000000 |
| H | -2.467403000 | 2.495622000  | 0.000000000 |
| H | -2.467403000 | -2.495622000 | 0.000000000 |
| C | 0.000000000  | 1.408716000  | 0.000000000 |
| C | 1.226237000  | 0.728620000  | 0.000000000 |
| C | 1.226237000  | -0.728620000 | 0.000000000 |
| C | 0.000000000  | -1.408716000 | 0.000000000 |
| H | 0.000000000  | -2.496160000 | 0.000000000 |
| H | 0.000000000  | 2.496160000  | 0.000000000 |
| C | -4.940835000 | 1.410334000  | 0.000000000 |
| C | -6.116597000 | 0.716377000  | 0.000000000 |
| H | -7.063938000 | 1.247277000  | 0.000000000 |
| C | -6.116597000 | -0.716377000 | 0.000000000 |
| H | -7.063938000 | -1.247277000 | 0.000000000 |
| C | -4.940835000 | -1.410334000 | 0.000000000 |
| H | -4.939202000 | -2.497168000 | 0.000000000 |
| H | -4.939202000 | 2.497168000  | 0.000000000 |
| C | 2.467115000  | 1.408070000  | 0.000000000 |
| C | 3.677901000  | 0.727630000  | 0.000000000 |
| C | 3.677901000  | -0.727630000 | 0.000000000 |
| C | 2.467115000  | -1.408070000 | 0.000000000 |
| H | 2.467403000  | -2.495622000 | 0.000000000 |
| H | 2.467403000  | 2.495622000  | 0.000000000 |
| C | 4.940835000  | 1.410334000  | 0.000000000 |
| C | 6.116597000  | 0.716377000  | 0.000000000 |
| H | 7.063938000  | 1.247277000  | 0.000000000 |
| C | 6.116597000  | -0.716377000 | 0.000000000 |
| H | 7.063938000  | -1.247277000 | 0.000000000 |
| C | 4.940835000  | -1.410334000 | 0.000000000 |
| H | 4.939202000  | -2.497168000 | 0.000000000 |

|   |             |             |             |
|---|-------------|-------------|-------------|
| H | 4.939202000 | 2.497168000 | 0.000000000 |
|---|-------------|-------------|-------------|

### Hexacene

|   |              |              |             |
|---|--------------|--------------|-------------|
| C | -1.231952000 | -1.409933000 | 0.000000000 |
| C | 0.000000000  | -0.730384000 | 0.000000000 |
| C | 0.000000000  | 0.730384000  | 0.000000000 |
| C | -1.231952000 | 1.409933000  | 0.000000000 |
| C | -2.456833000 | 0.729293000  | 0.000000000 |
| C | -2.456833000 | -0.729293000 | 0.000000000 |
| H | -1.232043000 | -2.497180000 | 0.000000000 |
| H | -1.232043000 | 2.497180000  | 0.000000000 |
| C | 1.231952000  | 1.409933000  | 0.000000000 |
| C | 1.231952000  | -1.409933000 | 0.000000000 |
| C | 2.456833000  | 0.729293000  | 0.000000000 |
| C | 2.456833000  | -0.729293000 | 0.000000000 |
| H | 1.232043000  | 2.497180000  | 0.000000000 |
| H | 1.232043000  | -2.497180000 | 0.000000000 |
| C | 3.697917000  | 1.408269000  | 0.000000000 |
| C | -3.697917000 | 1.408269000  | 0.000000000 |
| C | -3.697917000 | -1.408269000 | 0.000000000 |
| C | 3.697917000  | -1.408269000 | 0.000000000 |
| C | 4.910181000  | -0.727270000 | 0.000000000 |
| C | 4.910181000  | 0.727270000  | 0.000000000 |
| C | -4.910181000 | 0.727270000  | 0.000000000 |
| C | -4.910181000 | -0.727270000 | 0.000000000 |
| H | 3.697987000  | 2.495673000  | 0.000000000 |
| H | 3.697987000  | -2.495673000 | 0.000000000 |
| H | -3.697987000 | -2.495673000 | 0.000000000 |
| H | -3.697987000 | 2.495673000  | 0.000000000 |
| C | 6.172004000  | 1.409887000  | 0.000000000 |
| C | 6.172004000  | -1.409887000 | 0.000000000 |
| C | -6.172004000 | 1.409887000  | 0.000000000 |
| C | -6.172004000 | -1.409887000 | 0.000000000 |
| C | 7.348874000  | -0.715869000 | 0.000000000 |
| H | 8.296042000  | -1.246838000 | 0.000000000 |
| C | 7.348874000  | 0.715869000  | 0.000000000 |
| H | 8.296042000  | 1.246838000  | 0.000000000 |
| C | -7.348874000 | 0.715869000  | 0.000000000 |
| H | -8.296042000 | 1.246838000  | 0.000000000 |
| C | -7.348874000 | -0.715869000 | 0.000000000 |
| H | -8.296042000 | -1.246838000 | 0.000000000 |
| H | 6.170020000  | 2.496622000  | 0.000000000 |
| H | 6.170020000  | -2.496622000 | 0.000000000 |
| H | -6.170020000 | -2.496622000 | 0.000000000 |
| H | -6.170020000 | 2.496622000  | 0.000000000 |

### Heptacene

|   |              |              |             |
|---|--------------|--------------|-------------|
| C | -2.462501000 | -1.409493000 | 0.000000000 |
| C | -1.232676000 | -0.731134000 | 0.000000000 |
| C | -1.232676000 | 0.731134000  | 0.000000000 |
| C | -2.462501000 | 1.409493000  | 0.000000000 |
| C | -3.694602000 | 0.728336000  | 0.000000000 |
| C | -3.694602000 | -0.728336000 | 0.000000000 |
| H | -2.463073000 | -2.496833000 | 0.000000000 |
| H | -2.463073000 | 2.496833000  | 0.000000000 |
| C | 0.000000000  | 1.410542000  | 0.000000000 |
| C | 0.000000000  | -1.410542000 | 0.000000000 |
| C | 1.232676000  | 0.731134000  | 0.000000000 |
| C | 1.232676000  | -0.731134000 | 0.000000000 |
| H | 0.000000000  | 2.497838000  | 0.000000000 |
| H | 0.000000000  | -2.497838000 | 0.000000000 |
| C | 2.462501000  | 1.409493000  | 0.000000000 |
| C | -4.929474000 | 1.406798000  | 0.000000000 |
| C | -4.929474000 | -1.406798000 | 0.000000000 |

|   |              |              |             |
|---|--------------|--------------|-------------|
| C | 2.462501000  | -1.409493000 | 0.000000000 |
| C | 3.694602000  | -0.728336000 | 0.000000000 |
| C | 3.694602000  | 0.728336000  | 0.000000000 |
| C | -6.148980000 | 0.724962000  | 0.000000000 |
| C | -6.148980000 | -0.724962000 | 0.000000000 |
| H | 2.463073000  | 2.496833000  | 0.000000000 |
| H | 2.463073000  | -2.496833000 | 0.000000000 |
| H | -4.930037000 | -2.494323000 | 0.000000000 |
| H | -4.930037000 | 2.494323000  | 0.000000000 |
| C | 4.929474000  | 1.406798000  | 0.000000000 |
| C | 4.929474000  | -1.406798000 | 0.000000000 |
| C | -7.405949000 | 1.407943000  | 0.000000000 |
| C | -7.405949000 | -1.407943000 | 0.000000000 |
| C | 6.148980000  | -0.724962000 | 0.000000000 |
| C | 6.148980000  | 0.724962000  | 0.000000000 |
| C | -8.586649000 | 0.713612000  | 0.000000000 |
| H | -9.532928000 | 1.246385000  | 0.000000000 |
| C | -8.586649000 | -0.713612000 | 0.000000000 |
| H | -9.532928000 | -1.246385000 | 0.000000000 |
| H | 4.930037000  | 2.494323000  | 0.000000000 |
| H | 4.930037000  | -2.494323000 | 0.000000000 |
| H | -7.403876000 | -2.494802000 | 0.000000000 |
| H | -7.403876000 | 2.494802000  | 0.000000000 |
| C | 7.405949000  | 1.407943000  | 0.000000000 |
| C | 7.405949000  | -1.407943000 | 0.000000000 |
| C | 8.586649000  | -0.713612000 | 0.000000000 |
| H | 9.532928000  | -1.246385000 | 0.000000000 |
| C | 8.586649000  | 0.713612000  | 0.000000000 |
| H | 9.532928000  | 1.246385000  | 0.000000000 |
| H | 7.403876000  | 2.494802000  | 0.000000000 |
| H | 7.403876000  | -2.494802000 | 0.000000000 |

## Octacene

|   |             |              |              |
|---|-------------|--------------|--------------|
| C | 0.000000000 | 6.161556000  | 1.406192000  |
| C | 0.000000000 | 7.383168000  | 0.724214000  |
| C | 0.000000000 | 7.383168000  | -0.724214000 |
| C | 0.000000000 | 6.161556000  | -1.406192000 |
| C | 0.000000000 | 4.929265000  | -0.727599000 |
| C | 0.000000000 | 4.929265000  | 0.727599000  |
| H | 0.000000000 | 6.161964000  | 2.493726000  |
| H | 0.000000000 | 6.161964000  | -2.493726000 |
| C | 0.000000000 | 3.693584000  | 1.408861000  |
| C | 0.000000000 | 2.467292000  | 0.730743000  |
| C | 0.000000000 | 2.467292000  | -0.730743000 |
| C | 0.000000000 | 3.693584000  | -1.408861000 |
| H | 0.000000000 | 3.694022000  | -2.496223000 |
| H | 0.000000000 | 3.694022000  | 2.496223000  |
| C | 0.000000000 | 8.638847000  | 1.407404000  |
| C | 0.000000000 | 9.820440000  | 0.713036000  |
| H | 0.000000000 | 10.766518000 | 1.246165000  |
| C | 0.000000000 | 9.820440000  | -0.713036000 |
| H | 0.000000000 | 10.766518000 | -1.246165000 |
| C | 0.000000000 | 8.638847000  | -1.407404000 |
| H | 0.000000000 | 8.636642000  | -2.494266000 |
| H | 0.000000000 | 8.636642000  | 2.494266000  |
| C | 0.000000000 | 1.230586000  | 1.410189000  |
| C | 0.000000000 | 0.000000000  | 0.731837000  |
| C | 0.000000000 | 0.000000000  | -0.731837000 |
| C | 0.000000000 | 1.230586000  | -1.410189000 |
| H | 0.000000000 | 1.230693000  | -2.497503000 |
| H | 0.000000000 | 1.230693000  | 2.497503000  |
| C | 0.000000000 | -1.230586000 | 1.410189000  |
| C | 0.000000000 | -2.467292000 | 0.730743000  |
| C | 0.000000000 | -2.467292000 | -0.730743000 |
| C | 0.000000000 | -1.230586000 | -1.410189000 |
| H | 0.000000000 | -1.230693000 | -2.497503000 |
| H | 0.000000000 | -1.230693000 | 2.497503000  |

|   |             |               |              |
|---|-------------|---------------|--------------|
| C | 0.000000000 | -3.693584000  | 1.408861000  |
| C | 0.000000000 | -4.929265000  | 0.727599000  |
| C | 0.000000000 | -4.929265000  | -0.727599000 |
| C | 0.000000000 | -3.693584000  | -1.408861000 |
| H | 0.000000000 | -3.694022000  | -2.496223000 |
| H | 0.000000000 | -3.694022000  | 2.496223000  |
| C | 0.000000000 | -6.161556000  | 1.406192000  |
| C | 0.000000000 | -7.383168000  | 0.724214000  |
| C | 0.000000000 | -7.383168000  | -0.724214000 |
| C | 0.000000000 | -6.161556000  | -1.406192000 |
| H | 0.000000000 | -6.161964000  | -2.493726000 |
| H | 0.000000000 | -6.161964000  | 2.493726000  |
| C | 0.000000000 | -8.638847000  | 1.407404000  |
| C | 0.000000000 | -9.820440000  | 0.713036000  |
| H | 0.000000000 | -10.766518000 | 1.246165000  |
| C | 0.000000000 | -9.820440000  | -0.713036000 |
| H | 0.000000000 | -10.766518000 | -1.246165000 |
| H | 0.000000000 | -8.636642000  | 2.494266000  |
| C | 0.000000000 | -8.638847000  | -1.407404000 |
| H | 0.000000000 | -8.636642000  | -2.494266000 |

## Nonacene

|   |             |              |              |
|---|-------------|--------------|--------------|
| C | 0.000000000 | 7.393599000  | 1.406034000  |
| C | 0.000000000 | 8.615387000  | 0.724105000  |
| C | 0.000000000 | 8.615387000  | -0.724105000 |
| C | 0.000000000 | 7.393599000  | -1.406034000 |
| C | 0.000000000 | 6.161941000  | -0.727299000 |
| C | 0.000000000 | 6.161941000  | 0.727299000  |
| H | 0.000000000 | 7.393911000  | 2.493574000  |
| H | 0.000000000 | 7.393911000  | -2.493574000 |
| C | 0.000000000 | 4.925163000  | 1.408521000  |
| C | 0.000000000 | 3.700853000  | 0.730322000  |
| C | 0.000000000 | 3.700853000  | -0.730322000 |
| C | 0.000000000 | 4.925163000  | -1.408521000 |
| H | 0.000000000 | 4.925456000  | -2.495902000 |
| H | 0.000000000 | 4.925456000  | 2.495902000  |
| C | 0.000000000 | 9.871002000  | 1.407369000  |
| C | 0.000000000 | 11.052566000 | 0.713016000  |
| H | 0.000000000 | 11.998648000 | 1.246140000  |
| C | 0.000000000 | 11.052566000 | -0.713016000 |
| H | 0.000000000 | 11.998648000 | -1.246140000 |
| C | 0.000000000 | 9.871002000  | -1.407369000 |
| H | 0.000000000 | 9.868764000  | -2.494231000 |
| H | 0.000000000 | 9.868764000  | 2.494231000  |
| C | 0.000000000 | 2.461417000  | 1.409726000  |
| C | 0.000000000 | 1.234219000  | 0.731689000  |
| C | 0.000000000 | 1.234219000  | -0.731689000 |
| C | 0.000000000 | 2.461417000  | -1.409726000 |
| H | 0.000000000 | 2.461408000  | -2.497071000 |
| H | 0.000000000 | 2.461408000  | 2.497071000  |
| C | 0.000000000 | 0.000000000  | 1.409970000  |
| C | 0.000000000 | -1.234219000 | 0.731689000  |
| C | 0.000000000 | -1.234219000 | -0.731689000 |
| C | 0.000000000 | 0.000000000  | -1.409970000 |
| H | 0.000000000 | 0.000000000  | -2.497311000 |
| H | 0.000000000 | 0.000000000  | 2.497311000  |
| C | 0.000000000 | -2.461417000 | 1.409726000  |
| C | 0.000000000 | -3.700853000 | 0.730322000  |
| C | 0.000000000 | -3.700853000 | -0.730322000 |
| C | 0.000000000 | -2.461417000 | -1.409726000 |
| H | 0.000000000 | -2.461408000 | -2.497071000 |
| H | 0.000000000 | -2.461408000 | 2.497071000  |
| C | 0.000000000 | -4.925163000 | 1.408521000  |
| C | 0.000000000 | -6.161941000 | 0.727299000  |
| C | 0.000000000 | -6.161941000 | -0.727299000 |
| C | 0.000000000 | -4.925163000 | -1.408521000 |
| H | 0.000000000 | -4.925456000 | -2.495902000 |

|   |             |               |              |
|---|-------------|---------------|--------------|
| H | 0.000000000 | -4.925456000  | 2.495902000  |
| C | 0.000000000 | -7.393599000  | 1.406034000  |
| C | 0.000000000 | -8.615387000  | 0.724105000  |
| C | 0.000000000 | -8.615387000  | -0.724105000 |
| H | 0.000000000 | -7.393911000  | 2.493574000  |
| C | 0.000000000 | -7.393599000  | -1.406034000 |
| H | 0.000000000 | -7.393911000  | -2.493574000 |
| C | 0.000000000 | -9.871002000  | 1.407369000  |
| C | 0.000000000 | -11.052566000 | 0.713016000  |
| H | 0.000000000 | -11.998648000 | 1.246140000  |
| C | 0.000000000 | -11.052566000 | -0.713016000 |
| H | 0.000000000 | -11.998648000 | -1.246140000 |
| C | 0.000000000 | -9.871002000  | -1.407369000 |
| H | 0.000000000 | -9.868764000  | -2.494231000 |
| H | 0.000000000 | -9.868764000  | 2.494231000  |

## Decacene

|   |             |              |              |
|---|-------------|--------------|--------------|
| C | 0.000000000 | 8.625482000  | 1.406071000  |
| C | 0.000000000 | 9.846838000  | 0.724216000  |
| C | 0.000000000 | 9.846838000  | -0.724216000 |
| C | 0.000000000 | 8.625482000  | -1.406071000 |
| C | 0.000000000 | 7.393632000  | -0.727249000 |
| C | 0.000000000 | 7.393632000  | 0.727249000  |
| H | 0.000000000 | 8.625742000  | 2.493611000  |
| H | 0.000000000 | 8.625742000  | -2.493611000 |
| C | 0.000000000 | 6.156961000  | 1.408424000  |
| C | 0.000000000 | 4.933261000  | 0.730088000  |
| C | 0.000000000 | 4.933261000  | -0.730088000 |
| C | 0.000000000 | 6.156961000  | -1.408424000 |
| H | 0.000000000 | 6.157157000  | -2.495812000 |
| H | 0.000000000 | 6.157157000  | 2.495812000  |
| C | 0.000000000 | 11.102750000 | 1.407488000  |
| C | 0.000000000 | 12.284046000 | 0.713158000  |
| H | 0.000000000 | 13.230190000 | 1.246171000  |
| C | 0.000000000 | 12.284046000 | -0.713158000 |
| H | 0.000000000 | 13.230190000 | -1.246171000 |
| C | 0.000000000 | 11.102750000 | -1.407488000 |
| H | 0.000000000 | 11.100514000 | -2.494348000 |
| H | 0.000000000 | 11.100514000 | 2.494348000  |
| C | 0.000000000 | 3.692774000  | 1.409476000  |
| C | 0.000000000 | 2.467690000  | 0.731370000  |
| C | 0.000000000 | 2.467690000  | -0.731370000 |
| C | 0.000000000 | 3.692774000  | -1.409476000 |
| H | 0.000000000 | 3.692625000  | -2.496840000 |
| H | 0.000000000 | 3.692625000  | 2.496840000  |
| C | 0.000000000 | 1.230735000  | 1.409592000  |
| C | 0.000000000 | 0.000000000  | 0.731651000  |
| C | 0.000000000 | 0.000000000  | -0.731651000 |
| C | 0.000000000 | 1.230735000  | -1.409592000 |
| H | 0.000000000 | 1.230618000  | -2.496964000 |
| H | 0.000000000 | 1.230618000  | 2.496964000  |
| C | 0.000000000 | -1.230735000 | 1.409592000  |
| C | 0.000000000 | -2.467690000 | 0.731370000  |
| C | 0.000000000 | -2.467690000 | -0.731370000 |
| C | 0.000000000 | -1.230735000 | -1.409592000 |
| H | 0.000000000 | -1.230618000 | -2.496964000 |
| H | 0.000000000 | -1.230618000 | 2.496964000  |
| C | 0.000000000 | -3.692774000 | 1.409476000  |
| C | 0.000000000 | -4.933261000 | 0.730088000  |
| C | 0.000000000 | -4.933261000 | -0.730088000 |
| C | 0.000000000 | -3.692774000 | -1.409476000 |
| H | 0.000000000 | -3.692625000 | -2.496840000 |
| H | 0.000000000 | -3.692625000 | 2.496840000  |
| C | 0.000000000 | -6.156961000 | 1.408424000  |
| C | 0.000000000 | -7.393632000 | 0.727249000  |
| C | 0.000000000 | -7.393632000 | -0.727249000 |
| H | 0.000000000 | -6.157157000 | 2.495812000  |

|   |             |               |              |
|---|-------------|---------------|--------------|
| C | 0.000000000 | -6.156961000  | -1.408424000 |
| H | 0.000000000 | -6.157157000  | -2.495812000 |
| C | 0.000000000 | -8.625482000  | 1.406071000  |
| C | 0.000000000 | -9.846838000  | 0.724216000  |
| C | 0.000000000 | -9.846838000  | -0.724216000 |
| C | 0.000000000 | -8.625482000  | -1.406071000 |
| H | 0.000000000 | -8.625742000  | -2.493611000 |
| H | 0.000000000 | -8.625742000  | 2.493611000  |
| C | 0.000000000 | -11.102750000 | 1.407488000  |
| C | 0.000000000 | -12.284046000 | 0.713158000  |
| H | 0.000000000 | -13.230190000 | 1.246171000  |
| C | 0.000000000 | -12.284046000 | -0.713158000 |
| H | 0.000000000 | -13.230190000 | -1.246171000 |
| C | 0.000000000 | -11.102750000 | -1.407488000 |
| H | 0.000000000 | -11.100514000 | -2.494348000 |
| H | 0.000000000 | -11.100514000 | 2.494348000  |

## Undecacene

|   |             |              |              |
|---|-------------|--------------|--------------|
| C | 0.000000000 | 9.856685000  | 1.406257000  |
| C | 0.000000000 | 11.077690000 | 0.724349000  |
| C | 0.000000000 | 11.077690000 | -0.724349000 |
| C | 0.000000000 | 9.856685000  | -1.406257000 |
| C | 0.000000000 | 8.624666000  | -0.727394000 |
| C | 0.000000000 | 8.624666000  | 0.727394000  |
| H | 0.000000000 | 9.857828000  | 2.493797000  |
| H | 0.000000000 | 9.857828000  | -2.493797000 |
| C | 0.000000000 | 7.388442000  | 1.408521000  |
| C | 0.000000000 | 6.164712000  | 0.730160000  |
| C | 0.000000000 | 6.164712000  | -0.730160000 |
| C | 0.000000000 | 7.388442000  | -1.408521000 |
| H | 0.000000000 | 7.389712000  | -2.495927000 |
| H | 0.000000000 | 7.389712000  | 2.495927000  |
| C | 0.000000000 | 12.333683000 | 1.407616000  |
| C | 0.000000000 | 13.514866000 | 0.713188000  |
| H | 0.000000000 | 14.460799000 | 1.246585000  |
| C | 0.000000000 | 13.514866000 | -0.713188000 |
| H | 0.000000000 | 14.460799000 | -1.246585000 |
| C | 0.000000000 | 12.333683000 | -1.407616000 |
| H | 0.000000000 | 12.332048000 | -2.494469000 |
| H | 0.000000000 | 12.332048000 | 2.494469000  |
| C | 0.000000000 | 4.924304000  | 1.409452000  |
| C | 0.000000000 | 3.699945000  | 0.731307000  |
| C | 0.000000000 | 3.699945000  | -0.731307000 |
| C | 0.000000000 | 4.924304000  | -1.409452000 |
| H | 0.000000000 | 4.925084000  | -2.496851000 |
| H | 0.000000000 | 4.925084000  | 2.496851000  |
| C | 0.000000000 | 2.461950000  | 1.409396000  |
| C | 0.000000000 | 1.233406000  | 0.731488000  |
| C | 0.000000000 | 1.233406000  | -0.731488000 |
| C | 0.000000000 | 2.461950000  | -1.409396000 |
| H | 0.000000000 | 2.462281000  | -2.496814000 |
| H | 0.000000000 | 2.462281000  | 2.496814000  |
| C | 0.000000000 | 0.000000000  | 1.409253000  |
| C | 0.000000000 | -1.233406000 | 0.731488000  |
| C | 0.000000000 | -1.233406000 | -0.731488000 |
| C | 0.000000000 | 0.000000000  | -1.409253000 |
| H | 0.000000000 | 0.000000000  | -2.496679000 |
| H | 0.000000000 | 0.000000000  | 2.496679000  |
| C | 0.000000000 | -2.461950000 | 1.409396000  |
| C | 0.000000000 | -3.699945000 | 0.731307000  |
| C | 0.000000000 | -3.699945000 | -0.731307000 |
| C | 0.000000000 | -2.461950000 | -1.409396000 |
| H | 0.000000000 | -2.462281000 | -2.496814000 |
| H | 0.000000000 | -2.462281000 | 2.496814000  |
| C | 0.000000000 | -4.924304000 | 1.409452000  |
| C | 0.000000000 | -6.164712000 | 0.730160000  |
| C | 0.000000000 | -6.164712000 | -0.730160000 |



|   |             |               |              |
|---|-------------|---------------|--------------|
| H | 0.000000000 | -4.925084000  | 2.496851000  |
| C | 0.000000000 | -4.924304000  | -1.409452000 |
| H | 0.000000000 | -4.925084000  | -2.496851000 |
| C | 0.000000000 | -7.388442000  | 1.408521000  |
| C | 0.000000000 | -8.624666000  | 0.727394000  |
| C | 0.000000000 | -8.624666000  | -0.727394000 |
| C | 0.000000000 | -7.388442000  | -1.408521000 |
| H | 0.000000000 | -7.389712000  | -2.495927000 |
| H | 0.000000000 | -7.389712000  | 2.495927000  |
| C | 0.000000000 | -9.856685000  | 1.406257000  |
| C | 0.000000000 | -11.077690000 | 0.724349000  |
| C | 0.000000000 | -11.077690000 | -0.724349000 |
| C | 0.000000000 | -9.856685000  | -1.406257000 |
| H | 0.000000000 | -9.857828000  | -2.493797000 |
| H | 0.000000000 | -9.857828000  | 2.493797000  |
| C | 0.000000000 | -12.333683000 | 1.407616000  |
| C | 0.000000000 | -13.514866000 | 0.713188000  |
| H | 0.000000000 | -14.460799000 | 1.246585000  |
| C | 0.000000000 | -13.514866000 | -0.713188000 |
| H | 0.000000000 | -14.460799000 | -1.246585000 |
| C | 0.000000000 | -12.333683000 | -1.407616000 |
| H | 0.000000000 | -12.332048000 | -2.494469000 |
| H | 0.000000000 | -12.332048000 | 2.494469000  |

## Dodecacene

|   |             |              |              |
|---|-------------|--------------|--------------|
| C | 0.000000000 | 11.088588000 | 1.406307000  |
| C | 0.000000000 | 12.309248000 | 0.724453000  |
| C | 0.000000000 | 12.309248000 | -0.724453000 |
| C | 0.000000000 | 11.088588000 | -1.406307000 |
| C | 0.000000000 | 9.856194000  | -0.727433000 |
| C | 0.000000000 | 9.856194000  | 0.727433000  |
| H | 0.000000000 | 11.089546000 | 2.493845000  |
| H | 0.000000000 | 11.089546000 | -2.493845000 |
| C | 0.000000000 | 8.620398000  | 1.408563000  |
| C | 0.000000000 | 7.396352000  | 0.730132000  |
| C | 0.000000000 | 7.396352000  | -0.730132000 |
| C | 0.000000000 | 8.620398000  | -1.408563000 |
| H | 0.000000000 | 8.621513000  | -2.495962000 |
| H | 0.000000000 | 8.621513000  | 2.495962000  |
| C | 0.000000000 | 13.565501000 | 1.407696000  |
| C | 0.000000000 | 14.746501000 | 0.713309000  |
| H | 0.000000000 | 15.692535000 | 1.246525000  |
| C | 0.000000000 | 14.746501000 | -0.713309000 |
| H | 0.000000000 | 15.692535000 | -1.246525000 |
| C | 0.000000000 | 13.565501000 | -1.407696000 |
| H | 0.000000000 | 13.563743000 | -2.494550000 |
| H | 0.000000000 | 13.563743000 | 2.494550000  |
| C | 0.000000000 | 6.156238000  | 1.409470000  |
| C | 0.000000000 | 4.931890000  | 0.731190000  |
| C | 0.000000000 | 4.931890000  | -0.731190000 |
| C | 0.000000000 | 6.156238000  | -1.409470000 |
| H | 0.000000000 | 6.156974000  | -2.496863000 |
| H | 0.000000000 | 6.156974000  | 2.496863000  |
| C | 0.000000000 | 3.693684000  | 1.409320000  |
| C | 0.000000000 | 2.465943000  | 0.731231000  |
| C | 0.000000000 | 2.465943000  | -0.731231000 |
| C | 0.000000000 | 3.693684000  | -1.409320000 |
| H | 0.000000000 | 3.694078000  | -2.496739000 |
| H | 0.000000000 | 3.694078000  | 2.496739000  |
| C | 0.000000000 | 1.231270000  | 1.409001000  |
| C | 0.000000000 | 0.000000000  | 0.731130000  |
| C | 0.000000000 | 0.000000000  | -0.731130000 |
| C | 0.000000000 | 1.231270000  | -1.409001000 |
| H | 0.000000000 | 1.231392000  | -2.496438000 |
| H | 0.000000000 | 1.231392000  | 2.496438000  |
| C | 0.000000000 | -1.231270000 | 1.409001000  |
| C | 0.000000000 | -2.465943000 | 0.731231000  |

|   |             |               |              |
|---|-------------|---------------|--------------|
| C | 0.000000000 | -2.465943000  | -0.731231000 |
| C | 0.000000000 | -1.231270000  | -1.409001000 |
| H | 0.000000000 | -1.231392000  | -2.496438000 |
| H | 0.000000000 | -1.231392000  | 2.496438000  |
| C | 0.000000000 | -3.693684000  | 1.409320000  |
| C | 0.000000000 | -4.931890000  | 0.731190000  |
| C | 0.000000000 | -4.931890000  | -0.731190000 |
| H | 0.000000000 | -3.694078000  | 2.496739000  |
| C | 0.000000000 | -3.693684000  | -1.409320000 |
| H | 0.000000000 | -3.694078000  | -2.496739000 |
| C | 0.000000000 | -6.156238000  | 1.409470000  |
| C | 0.000000000 | -7.396352000  | 0.730132000  |
| C | 0.000000000 | -7.396352000  | -0.730132000 |
| C | 0.000000000 | -6.156238000  | -1.409470000 |
| H | 0.000000000 | -6.156974000  | -2.496863000 |
| H | 0.000000000 | -6.156974000  | 2.496863000  |
| C | 0.000000000 | -8.620398000  | 1.408563000  |
| C | 0.000000000 | -9.856194000  | 0.727433000  |
| C | 0.000000000 | -9.856194000  | -0.727433000 |
| C | 0.000000000 | -8.620398000  | -1.408563000 |
| H | 0.000000000 | -8.621513000  | -2.495962000 |
| H | 0.000000000 | -8.621513000  | 2.495962000  |
| C | 0.000000000 | -11.088588000 | 1.406307000  |
| C | 0.000000000 | -12.309248000 | 0.724453000  |
| C | 0.000000000 | -12.309248000 | -0.724453000 |
| C | 0.000000000 | -11.088588000 | -1.406307000 |
| H | 0.000000000 | -11.089546000 | -2.493845000 |
| H | 0.000000000 | -11.089546000 | 2.493845000  |
| C | 0.000000000 | -13.565501000 | 1.407696000  |
| C | 0.000000000 | -14.746501000 | 0.713309000  |
| H | 0.000000000 | -15.692535000 | 1.246525000  |
| C | 0.000000000 | -14.746501000 | -0.713309000 |
| H | 0.000000000 | -15.692535000 | -1.246525000 |
| C | 0.000000000 | -13.565501000 | -1.407696000 |
| H | 0.000000000 | -13.563743000 | -2.494550000 |
| H | 0.000000000 | -13.563743000 | 2.494550000  |

### Triplet geometries (B3LYP/6-31G\*\*)

#### Napthalene

|   |              |              |             |
|---|--------------|--------------|-------------|
| C | -1.237876000 | 1.401369000  | 0.000000000 |
| C | -2.486974000 | 0.681592000  | 0.000000000 |
| C | -2.486974000 | -0.681592000 | 0.000000000 |
| C | -1.237876000 | -1.401369000 | 0.000000000 |
| C | 0.000000000  | -0.725032000 | 0.000000000 |
| C | 0.000000000  | 0.725032000  | 0.000000000 |
| H | -1.245144000 | 2.487413000  | 0.000000000 |
| H | -3.418707000 | 1.238706000  | 0.000000000 |
| H | -3.418707000 | -1.238706000 | 0.000000000 |
| H | -1.245144000 | -2.487413000 | 0.000000000 |
| C | 1.237876000  | 1.401369000  | 0.000000000 |
| C | 2.486974000  | 0.681592000  | 0.000000000 |
| H | 3.418707000  | 1.238706000  | 0.000000000 |
| C | 2.486974000  | -0.681592000 | 0.000000000 |
| H | 3.418707000  | -1.238706000 | 0.000000000 |
| C | 1.237876000  | -1.401369000 | 0.000000000 |
| H | 1.245144000  | -2.487413000 | 0.000000000 |
| H | 1.245144000  | 2.487413000  | 0.000000000 |

#### Anthracene

|   |              |              |             |
|---|--------------|--------------|-------------|
| C | 0.000000000  | 1.406685000  | 0.000000000 |
| C | -1.254468000 | 0.720579000  | 0.000000000 |
| C | -1.254468000 | -0.720579000 | 0.000000000 |

|   |              |              |             |
|---|--------------|--------------|-------------|
| C | 0.000000000  | -1.406685000 | 0.000000000 |
| C | 1.254468000  | -0.720579000 | 0.000000000 |
| C | 1.254468000  | 0.720579000  | 0.000000000 |
| H | 0.000000000  | 2.493609000  | 0.000000000 |
| H | 0.000000000  | -2.493609000 | 0.000000000 |
| C | 2.479591000  | 1.395892000  | 0.000000000 |
| C | 3.704323000  | 0.691547000  | 0.000000000 |
| H | 4.639806000  | 1.242492000  | 0.000000000 |
| C | 3.704323000  | -0.691547000 | 0.000000000 |
| H | 4.639806000  | -1.242492000 | 0.000000000 |
| C | 2.479591000  | -1.395892000 | 0.000000000 |
| H | 2.482973000  | -2.482681000 | 0.000000000 |
| H | 2.482973000  | 2.482681000  | 0.000000000 |
| C | -2.479591000 | 1.395892000  | 0.000000000 |
| C | -3.704323000 | 0.691547000  | 0.000000000 |
| H | -4.639806000 | 1.242492000  | 0.000000000 |
| C | -3.704323000 | -0.691547000 | 0.000000000 |
| H | -4.639806000 | -1.242492000 | 0.000000000 |
| C | -2.479591000 | -1.395892000 | 0.000000000 |
| H | -2.482973000 | -2.482681000 | 0.000000000 |
| H | -2.482973000 | 2.482681000  | 0.000000000 |

## Tetracene

|   |              |              |             |
|---|--------------|--------------|-------------|
| C | -1.230778000 | 1.405106000  | 0.000000000 |
| C | -2.485893000 | 0.717443000  | 0.000000000 |
| C | -2.485893000 | -0.717443000 | 0.000000000 |
| C | -1.230778000 | -1.405106000 | 0.000000000 |
| C | 0.000000000  | -0.730888000 | 0.000000000 |
| C | 0.000000000  | 0.730888000  | 0.000000000 |
| H | -1.234930000 | 2.492377000  | 0.000000000 |
| H | -1.234930000 | -2.492377000 | 0.000000000 |
| C | 1.230778000  | 1.405106000  | 0.000000000 |
| C | 2.485893000  | 0.717443000  | 0.000000000 |
| C | 2.485893000  | -0.717443000 | 0.000000000 |
| C | 1.230778000  | -1.405106000 | 0.000000000 |
| H | 1.234930000  | -2.492377000 | 0.000000000 |
| H | 1.234930000  | 2.492377000  | 0.000000000 |
| C | -3.715408000 | 1.397431000  | 0.000000000 |
| C | -4.924323000 | 0.698580000  | 0.000000000 |
| H | -5.863540000 | 1.243371000  | 0.000000000 |
| C | -4.924323000 | -0.698580000 | 0.000000000 |
| H | -5.863540000 | -1.243371000 | 0.000000000 |
| C | -3.715408000 | -1.397431000 | 0.000000000 |
| H | -3.715321000 | -2.484342000 | 0.000000000 |
| H | -3.715321000 | 2.484342000  | 0.000000000 |
| C | 3.715408000  | 1.397431000  | 0.000000000 |
| C | 4.924323000  | 0.698580000  | 0.000000000 |
| H | 5.863540000  | 1.243371000  | 0.000000000 |
| C | 4.924323000  | -0.698580000 | 0.000000000 |
| H | 5.863540000  | -1.243371000 | 0.000000000 |
| C | 3.715408000  | -1.397431000 | 0.000000000 |
| H | 3.715321000  | -2.484342000 | 0.000000000 |
| H | 3.715321000  | 2.484342000  | 0.000000000 |

## Pentacene

|   |              |              |             |
|---|--------------|--------------|-------------|
| C | -2.463400000 | 1.403296000  | 0.000000000 |
| C | -3.711875000 | 0.717599000  | 0.000000000 |
| C | -3.711875000 | -0.717599000 | 0.000000000 |
| C | -2.463400000 | -1.403296000 | 0.000000000 |
| C | -1.243847000 | -0.729750000 | 0.000000000 |
| C | -1.243847000 | 0.729750000  | 0.000000000 |
| H | -2.466997000 | 2.490804000  | 0.000000000 |
| H | -2.466997000 | -2.490804000 | 0.000000000 |
| C | 0.000000000  | 1.408663000  | 0.000000000 |

|   |              |              |             |
|---|--------------|--------------|-------------|
| C | 1.243847000  | 0.729750000  | 0.000000000 |
| C | 1.243847000  | -0.729750000 | 0.000000000 |
| C | 0.000000000  | -1.408663000 | 0.000000000 |
| H | 0.000000000  | -2.495882000 | 0.000000000 |
| H | 0.000000000  | 2.495882000  | 0.000000000 |
| C | -4.948354000 | 1.400039000  | 0.000000000 |
| C | -6.147039000 | 0.703490000  | 0.000000000 |
| H | -7.088690000 | 1.244209000  | 0.000000000 |
| C | -6.147039000 | -0.703490000 | 0.000000000 |
| H | -7.088690000 | -1.244209000 | 0.000000000 |
| C | -4.948354000 | -1.400039000 | 0.000000000 |
| H | -4.946939000 | -2.486960000 | 0.000000000 |
| H | -4.946939000 | 2.486960000  | 0.000000000 |
| C | 2.463400000  | 1.403296000  | 0.000000000 |
| C | 3.711875000  | 0.717599000  | 0.000000000 |
| C | 3.711875000  | -0.717599000 | 0.000000000 |
| C | 2.463400000  | -1.403296000 | 0.000000000 |
| H | 2.466997000  | -2.490804000 | 0.000000000 |
| H | 2.466997000  | 2.490804000  | 0.000000000 |
| C | 4.948354000  | 1.400039000  | 0.000000000 |
| C | 6.147039000  | 0.703490000  | 0.000000000 |
| H | 7.088690000  | 1.244209000  | 0.000000000 |
| C | 6.147039000  | -0.703490000 | 0.000000000 |
| H | 7.088690000  | -1.244209000 | 0.000000000 |
| C | 4.948354000  | -1.400039000 | 0.000000000 |
| H | 4.946939000  | -2.486960000 | 0.000000000 |
| H | 4.946939000  | 2.486960000  | 0.000000000 |

## Hexacene

|   |              |              |             |
|---|--------------|--------------|-------------|
| C | -1.228908000 | -1.408358000 | 0.000000000 |
| C | 0.000000000  | -0.733717000 | 0.000000000 |
| C | 0.000000000  | 0.733717000  | 0.000000000 |
| C | -1.228908000 | 1.408358000  | 0.000000000 |
| C | -2.478565000 | 0.727395000  | 0.000000000 |
| C | -2.478565000 | -0.727395000 | 0.000000000 |
| H | -1.230957000 | -2.495702000 | 0.000000000 |
| H | -1.230957000 | 2.495702000  | 0.000000000 |
| C | 1.228908000  | 1.408358000  | 0.000000000 |
| C | 1.228908000  | -1.408358000 | 0.000000000 |
| C | 2.478565000  | 0.727395000  | 0.000000000 |
| C | 2.478565000  | -0.727395000 | 0.000000000 |
| H | 1.230957000  | 2.495702000  | 0.000000000 |
| H | 1.230957000  | -2.495702000 | 0.000000000 |
| C | 3.696331000  | 1.402995000  | 0.000000000 |
| C | -3.696331000 | 1.402995000  | 0.000000000 |
| C | -3.696331000 | -1.402995000 | 0.000000000 |
| C | 3.696331000  | -1.402995000 | 0.000000000 |
| C | 4.936789000  | -0.718992000 | 0.000000000 |
| C | 4.936789000  | 0.718992000  | 0.000000000 |
| C | -4.936789000 | 0.718992000  | 0.000000000 |
| C | -4.936789000 | -0.718992000 | 0.000000000 |
| H | 3.698642000  | 2.490584000  | 0.000000000 |
| H | 3.698642000  | -2.490584000 | 0.000000000 |
| H | -3.698642000 | -2.490584000 | 0.000000000 |
| H | -3.698642000 | 2.490584000  | 0.000000000 |
| C | 6.179623000  | 1.402409000  | 0.000000000 |
| C | 6.179623000  | -1.402409000 | 0.000000000 |
| C | -6.179623000 | 1.402409000  | 0.000000000 |
| C | -6.179623000 | -1.402409000 | 0.000000000 |
| C | 7.371505000  | -0.706982000 | 0.000000000 |
| H | 8.314819000  | -1.244877000 | 0.000000000 |
| C | 7.371505000  | 0.706982000  | 0.000000000 |
| H | 8.314819000  | 1.244877000  | 0.000000000 |
| C | -7.371505000 | 0.706982000  | 0.000000000 |
| H | -8.314819000 | 1.244877000  | 0.000000000 |
| C | -7.371505000 | -0.706982000 | 0.000000000 |
| H | -8.314819000 | -1.244877000 | 0.000000000 |

|   |              |              |             |
|---|--------------|--------------|-------------|
| H | 6.177691000  | 2.489313000  | 0.000000000 |
| H | 6.177691000  | -2.489313000 | 0.000000000 |
| H | -6.177691000 | -2.489313000 | 0.000000000 |
| H | -6.177691000 | 2.489313000  | 0.000000000 |

## Heptacene

|   |              |              |             |
|---|--------------|--------------|-------------|
| C | -2.459057000 | -1.407579000 | 0.000000000 |
| C | -1.239478000 | -0.733171000 | 0.000000000 |
| C | -1.239478000 | 0.733171000  | 0.000000000 |
| C | -2.459057000 | 1.407579000  | 0.000000000 |
| C | -3.708456000 | 0.726187000  | 0.000000000 |
| C | -3.708456000 | -0.726187000 | 0.000000000 |
| H | -2.461222000 | -2.495013000 | 0.000000000 |
| H | -2.461222000 | 2.495013000  | 0.000000000 |
| C | 0.000000000  | 1.409880000  | 0.000000000 |
| C | 0.000000000  | -1.409880000 | 0.000000000 |
| C | 1.239478000  | 0.733171000  | 0.000000000 |
| C | 1.239478000  | -0.733171000 | 0.000000000 |
| H | 0.000000000  | 2.497235000  | 0.000000000 |
| H | 0.000000000  | -2.497235000 | 0.000000000 |
| C | 2.459057000  | 1.407579000  | 0.000000000 |
| C | -4.928671000 | 1.403509000  | 0.000000000 |
| C | -4.928671000 | -1.403509000 | 0.000000000 |
| C | 2.459057000  | -1.407579000 | 0.000000000 |
| C | 3.708456000  | -0.726187000 | 0.000000000 |
| C | 3.708456000  | 0.726187000  | 0.000000000 |
| C | -6.161949000 | 0.720657000  | 0.000000000 |
| C | -6.161949000 | -0.720657000 | 0.000000000 |
| H | 2.461222000  | 2.495013000  | 0.000000000 |
| H | 2.461222000  | -2.495013000 | 0.000000000 |
| H | -4.930041000 | -2.491118000 | 0.000000000 |
| H | -4.930041000 | 2.491118000  | 0.000000000 |
| C | 4.928671000  | 1.403509000  | 0.000000000 |
| C | 4.928671000  | -1.403509000 | 0.000000000 |
| C | -7.409907000 | 1.404353000  | 0.000000000 |
| C | -7.409907000 | -1.404353000 | 0.000000000 |
| C | 6.161949000  | -0.720657000 | 0.000000000 |
| C | 6.161949000  | 0.720657000  | 0.000000000 |
| C | -8.597105000 | 0.709524000  | 0.000000000 |
| H | -9.541585000 | 1.245412000  | 0.000000000 |
| C | -8.597105000 | -0.709524000 | 0.000000000 |
| H | -9.541585000 | -1.245412000 | 0.000000000 |
| H | 4.930041000  | 2.491118000  | 0.000000000 |
| H | 4.930041000  | -2.491118000 | 0.000000000 |
| H | -7.407779000 | -2.491239000 | 0.000000000 |
| H | -7.407779000 | 2.491239000  | 0.000000000 |
| C | 7.409907000  | 1.404353000  | 0.000000000 |
| C | 7.409907000  | -1.404353000 | 0.000000000 |
| C | 8.597105000  | -0.709524000 | 0.000000000 |
| H | 9.541585000  | -1.245412000 | 0.000000000 |
| C | 8.597105000  | 0.709524000  | 0.000000000 |
| H | 9.541585000  | 1.245412000  | 0.000000000 |
| H | 7.407779000  | 2.491239000  | 0.000000000 |
| H | 7.407779000  | -2.491239000 | 0.000000000 |

## Octacene

|   |             |             |              |
|---|-------------|-------------|--------------|
| C | 0.000000000 | 6.160354000 | 1.404307000  |
| C | 0.000000000 | 7.387792000 | 0.722222000  |
| C | 0.000000000 | 7.387792000 | -0.722222000 |
| C | 0.000000000 | 6.160354000 | -1.404307000 |
| C | 0.000000000 | 4.936305000 | -0.725939000 |
| C | 0.000000000 | 4.936305000 | 0.725939000  |
| H | 0.000000000 | 6.161187000 | 2.491907000  |
| H | 0.000000000 | 6.161187000 | -2.491907000 |

|   |             |               |              |
|---|-------------|---------------|--------------|
| C | 0.000000000 | 3.690156000   | 1.407200000  |
| C | 0.000000000 | 2.474156000   | 0.731628000  |
| C | 0.000000000 | 2.474156000   | -0.731628000 |
| C | 0.000000000 | 3.690156000   | -1.407200000 |
| H | 0.000000000 | 3.691832000   | -2.494667000 |
| H | 0.000000000 | 3.691832000   | 2.494667000  |
| C | 0.000000000 | 8.639740000   | 1.405896000  |
| C | 0.000000000 | 9.823635000   | 0.711406000  |
| H | 0.000000000 | 10.768950000  | 1.245846000  |
| C | 0.000000000 | 9.823635000   | -0.711406000 |
| H | 0.000000000 | 10.768950000  | -1.245846000 |
| C | 0.000000000 | 8.639740000   | -1.405896000 |
| H | 0.000000000 | 8.637611000   | -2.492764000 |
| H | 0.000000000 | 8.637611000   | 2.492764000  |
| C | 0.000000000 | 1.228342000   | 1.409844000  |
| C | 0.000000000 | 0.000000000   | 0.734986000  |
| C | 0.000000000 | 0.000000000   | -0.734986000 |
| C | 0.000000000 | 1.228342000   | -1.409844000 |
| H | 0.000000000 | 1.229426000   | -2.497242000 |
| H | 0.000000000 | 1.229426000   | 2.497242000  |
| C | 0.000000000 | -1.228342000  | 1.409844000  |
| C | 0.000000000 | -2.474156000  | 0.731628000  |
| C | 0.000000000 | -2.474156000  | -0.731628000 |
| C | 0.000000000 | -1.228342000  | -1.409844000 |
| H | 0.000000000 | -1.229426000  | -2.497242000 |
| H | 0.000000000 | -1.229426000  | 2.497242000  |
| C | 0.000000000 | -3.690156000  | 1.407200000  |
| C | 0.000000000 | -4.936305000  | 0.725939000  |
| C | 0.000000000 | -4.936305000  | -0.725939000 |
| C | 0.000000000 | -3.690156000  | -1.407200000 |
| H | 0.000000000 | -3.691832000  | -2.494667000 |
| H | 0.000000000 | -3.691832000  | 2.494667000  |
| C | 0.000000000 | -6.160354000  | 1.404307000  |
| C | 0.000000000 | -7.387792000  | 0.722222000  |
| C | 0.000000000 | -7.387792000  | -0.722222000 |
| C | 0.000000000 | -6.160354000  | -1.404307000 |
| H | 0.000000000 | -6.161187000  | -2.491907000 |
| H | 0.000000000 | -6.161187000  | 2.491907000  |
| C | 0.000000000 | -8.639740000  | 1.405896000  |
| C | 0.000000000 | -9.823635000  | 0.711406000  |
| H | 0.000000000 | -10.768950000 | 1.245846000  |
| C | 0.000000000 | -9.823635000  | -0.711406000 |
| H | 0.000000000 | -10.768950000 | -1.245846000 |
| H | 0.000000000 | -8.637611000  | 2.492764000  |
| C | 0.000000000 | -8.639740000  | -1.405896000 |
| H | 0.000000000 | -8.637611000  | -2.492764000 |

## Nonacene

|   |             |              |              |
|---|-------------|--------------|--------------|
| C | 0.000000000 | 7.391373000  | 1.405158000  |
| C | 0.000000000 | 8.614196000  | 0.723594000  |
| C | 0.000000000 | 8.614196000  | -0.723594000 |
| C | 0.000000000 | 7.391373000  | -1.405158000 |
| C | 0.000000000 | 6.163398000  | -0.726241000 |
| C | 0.000000000 | 6.163398000  | 0.726241000  |
| H | 0.000000000 | 7.391896000  | 2.492744000  |
| H | 0.000000000 | 7.391896000  | -2.492744000 |
| C | 0.000000000 | 4.921492000  | 1.407254000  |
| C | 0.000000000 | 3.705440000  | 0.730442000  |
| C | 0.000000000 | 3.705440000  | -0.730442000 |
| C | 0.000000000 | 4.921492000  | -1.407254000 |
| H | 0.000000000 | 4.922651000  | -2.494725000 |
| H | 0.000000000 | 4.922651000  | 2.494725000  |
| C | 0.000000000 | 9.869210000  | 1.407121000  |
| C | 0.000000000 | 11.050702000 | 0.712824000  |
| H | 0.000000000 | 11.996631000 | 1.246190000  |
| C | 0.000000000 | 11.050702000 | -0.712824000 |
| H | 0.000000000 | 11.996631000 | -1.246190000 |

|   |             |               |              |
|---|-------------|---------------|--------------|
| C | 0.000000000 | 9.869210000   | -1.407121000 |
| H | 0.000000000 | 9.867126000   | -2.493975000 |
| H | 0.000000000 | 9.867126000   | 2.493975000  |
| C | 0.000000000 | 2.457593000   | 1.409444000  |
| C | 0.000000000 | 1.237112000   | 0.734615000  |
| C | 0.000000000 | 1.237112000   | -0.734615000 |
| C | 0.000000000 | 2.457593000   | -1.409444000 |
| H | 0.000000000 | 2.458891000   | -2.496878000 |
| H | 0.000000000 | 2.458891000   | 2.496878000  |
| C | 0.000000000 | 0.000000000   | 1.410624000  |
| C | 0.000000000 | -1.237112000  | 0.734615000  |
| C | 0.000000000 | -1.237112000  | -0.734615000 |
| C | 0.000000000 | 0.000000000   | -1.410624000 |
| H | 0.000000000 | 0.000000000   | -2.498027000 |
| H | 0.000000000 | 0.000000000   | 2.498027000  |
| C | 0.000000000 | -2.457593000  | 1.409444000  |
| C | 0.000000000 | -3.705440000  | 0.730442000  |
| C | 0.000000000 | -3.705440000  | -0.730442000 |
| C | 0.000000000 | -2.457593000  | -1.409444000 |
| H | 0.000000000 | -2.458891000  | -2.496878000 |
| H | 0.000000000 | -2.458891000  | 2.496878000  |
| C | 0.000000000 | -4.921492000  | 1.407254000  |
| C | 0.000000000 | -6.163398000  | 0.726241000  |
| C | 0.000000000 | -6.163398000  | -0.726241000 |
| C | 0.000000000 | -4.921492000  | -1.407254000 |
| H | 0.000000000 | -4.922651000  | -2.494725000 |
| H | 0.000000000 | -4.922651000  | 2.494725000  |
| C | 0.000000000 | -7.391373000  | 1.405158000  |
| C | 0.000000000 | -8.614196000  | 0.723594000  |
| C | 0.000000000 | -8.614196000  | -0.723594000 |
| H | 0.000000000 | -7.391896000  | 2.492744000  |
| C | 0.000000000 | -7.391373000  | -1.405158000 |
| H | 0.000000000 | -7.391896000  | -2.492744000 |
| C | 0.000000000 | -9.869210000  | 1.407121000  |
| C | 0.000000000 | -11.050702000 | 0.712824000  |
| H | 0.000000000 | -11.996631000 | 1.246190000  |
| C | 0.000000000 | -11.050702000 | -0.712824000 |
| H | 0.000000000 | -11.996631000 | -1.246190000 |
| C | 0.000000000 | -9.869210000  | -1.407121000 |
| H | 0.000000000 | -9.867126000  | -2.493975000 |
| H | 0.000000000 | -9.867126000  | 2.493975000  |

## Decacene

|   |             |              |              |
|---|-------------|--------------|--------------|
| C | 0.000000000 | 8.621906000  | 1.405956000  |
| C | 0.000000000 | 9.841124000  | 0.724750000  |
| C | 0.000000000 | 9.841124000  | -0.724750000 |
| C | 0.000000000 | 8.621906000  | -1.405956000 |
| C | 0.000000000 | 7.390389000  | -0.726790000 |
| C | 0.000000000 | 7.390389000  | 0.726790000  |
| H | 0.000000000 | 8.622264000  | 2.493528000  |
| H | 0.000000000 | 8.622264000  | -2.493528000 |
| C | 0.000000000 | 6.152705000  | 1.407566000  |
| C | 0.000000000 | 4.934750000  | 0.729827000  |
| C | 0.000000000 | 4.934750000  | -0.729827000 |
| C | 0.000000000 | 6.152705000  | -1.407566000 |
| H | 0.000000000 | 6.153481000  | -2.495027000 |
| H | 0.000000000 | 6.153481000  | 2.495027000  |
| C | 0.000000000 | 11.098497000 | 1.408089000  |
| C | 0.000000000 | 12.278212000 | 0.713906000  |
| H | 0.000000000 | 13.224600000 | 1.246463000  |
| C | 0.000000000 | 12.278212000 | -0.713906000 |
| H | 0.000000000 | 13.224600000 | -1.246463000 |
| C | 0.000000000 | 11.098497000 | -1.408089000 |
| H | 0.000000000 | 11.096485000 | -2.494933000 |
| H | 0.000000000 | 11.096485000 | 2.494933000  |
| C | 0.000000000 | 3.687735000  | 1.409174000  |
| C | 0.000000000 | 2.471292000  | 0.733532000  |

|   |             |               |              |
|---|-------------|---------------|--------------|
| C | 0.000000000 | 2.471292000   | -0.733532000 |
| C | 0.000000000 | 3.687735000   | -1.409174000 |
| H | 0.000000000 | 3.688822000   | -2.496620000 |
| H | 0.000000000 | 3.688822000   | 2.496620000  |
| C | 0.000000000 | 1.228172000   | 1.410629000  |
| C | 0.000000000 | 0.000000000   | 0.735589000  |
| C | 0.000000000 | 0.000000000   | -0.735589000 |
| C | 0.000000000 | 1.228172000   | -1.410629000 |
| H | 0.000000000 | 1.228830000   | -2.498051000 |
| H | 0.000000000 | 1.228830000   | 2.498051000  |
| C | 0.000000000 | -1.228172000  | 1.410629000  |
| C | 0.000000000 | -2.471292000  | 0.733532000  |
| C | 0.000000000 | -2.471292000  | -0.733532000 |
| C | 0.000000000 | -1.228172000  | -1.410629000 |
| H | 0.000000000 | -1.228830000  | -2.498051000 |
| H | 0.000000000 | -1.228830000  | 2.498051000  |
| C | 0.000000000 | -3.687735000  | 1.409174000  |
| C | 0.000000000 | -4.934750000  | 0.729827000  |
| C | 0.000000000 | -4.934750000  | -0.729827000 |
| C | 0.000000000 | -3.687735000  | -1.409174000 |
| H | 0.000000000 | -3.688822000  | -2.496620000 |
| H | 0.000000000 | -3.688822000  | 2.496620000  |
| C | 0.000000000 | -6.152705000  | 1.407566000  |
| C | 0.000000000 | -7.390389000  | 0.726790000  |
| C | 0.000000000 | -7.390389000  | -0.726790000 |
| H | 0.000000000 | -6.153481000  | 2.495027000  |
| C | 0.000000000 | -6.152705000  | -1.407566000 |
| H | 0.000000000 | -6.153481000  | -2.495027000 |
| C | 0.000000000 | -8.621906000  | 1.405956000  |
| C | 0.000000000 | -9.841124000  | 0.724750000  |
| C | 0.000000000 | -9.841124000  | -0.724750000 |
| C | 0.000000000 | -8.621906000  | -1.405956000 |
| H | 0.000000000 | -8.622264000  | -2.493528000 |
| H | 0.000000000 | -8.622264000  | 2.493528000  |
| C | 0.000000000 | -11.098497000 | 1.408089000  |
| C | 0.000000000 | -12.278212000 | 0.713906000  |
| H | 0.000000000 | -13.224600000 | 1.246463000  |
| C | 0.000000000 | -12.278212000 | -0.713906000 |
| H | 0.000000000 | -13.224600000 | -1.246463000 |
| C | 0.000000000 | -11.098497000 | -1.408089000 |
| H | 0.000000000 | -11.096485000 | -2.494933000 |
| H | 0.000000000 | -11.096485000 | 2.494933000  |

## Undecacene

|   |             |              |              |
|---|-------------|--------------|--------------|
| C | 0.000000000 | 9.852169000  | 1.406651000  |
| C | 0.000000000 | 11.068749000 | 0.725669000  |
| C | 0.000000000 | 11.068749000 | -0.725669000 |
| C | 0.000000000 | 9.852169000  | -1.406651000 |
| C | 0.000000000 | 8.617778000  | -0.727441000 |
| C | 0.000000000 | 8.617778000  | 0.727441000  |
| H | 0.000000000 | 9.852720000  | 2.494205000  |
| H | 0.000000000 | 9.852720000  | -2.494205000 |
| C | 0.000000000 | 7.383727000  | 1.407983000  |
| C | 0.000000000 | 6.163203000  | 0.729711000  |
| C | 0.000000000 | 6.163203000  | -0.729711000 |
| C | 0.000000000 | 7.383727000  | -1.407983000 |
| H | 0.000000000 | 7.384491000  | -2.495432000 |
| H | 0.000000000 | 7.384491000  | 2.495432000  |
| C | 0.000000000 | 12.327811000 | 1.408800000  |
| C | 0.000000000 | 13.506314000 | 0.714656000  |
| H | 0.000000000 | 14.452930000 | 1.246814000  |
| C | 0.000000000 | 13.506314000 | -0.714656000 |
| H | 0.000000000 | 14.452930000 | -1.246814000 |
| C | 0.000000000 | 12.327811000 | -1.408800000 |
| H | 0.000000000 | 12.326093000 | -2.495630000 |
| H | 0.000000000 | 12.326093000 | 2.495630000  |
| C | 0.000000000 | 4.918446000  | 1.409116000  |



|   |             |               |              |
|---|-------------|---------------|--------------|
| C | 0.000000000 | 3.703080000   | 0.732571000  |
| C | 0.000000000 | 3.703080000   | -0.732571000 |
| C | 0.000000000 | 4.918446000   | -1.409116000 |
| H | 0.000000000 | 4.919359000   | -2.496565000 |
| H | 0.000000000 | 4.919359000   | 2.496565000  |
| C | 0.000000000 | 2.457098000   | 1.410363000  |
| C | 0.000000000 | 1.235674000   | 0.735315000  |
| C | 0.000000000 | 1.235674000   | -0.735315000 |
| C | 0.000000000 | 2.457098000   | -1.410363000 |
| H | 0.000000000 | 2.458000000   | -2.497806000 |
| H | 0.000000000 | 2.458000000   | 2.497806000  |
| C | 0.000000000 | 0.000000000   | 1.411029000  |
| C | 0.000000000 | -1.235674000  | 0.735315000  |
| C | 0.000000000 | -1.235674000  | -0.735315000 |
| C | 0.000000000 | 0.000000000   | -1.411029000 |
| H | 0.000000000 | 0.000000000   | -2.498460000 |
| H | 0.000000000 | 0.000000000   | 2.498460000  |
| C | 0.000000000 | -2.457098000  | 1.410363000  |
| C | 0.000000000 | -3.703080000  | 0.732571000  |
| C | 0.000000000 | -3.703080000  | -0.732571000 |
| C | 0.000000000 | -2.457098000  | -1.410363000 |
| H | 0.000000000 | -2.458000000  | -2.497806000 |
| H | 0.000000000 | -2.458000000  | 2.497806000  |
| C | 0.000000000 | -4.918446000  | 1.409116000  |
| C | 0.000000000 | -6.163203000  | 0.729711000  |
| C | 0.000000000 | -6.163203000  | -0.729711000 |
| H | 0.000000000 | -4.919359000  | 2.496565000  |
| C | 0.000000000 | -4.918446000  | -1.409116000 |
| H | 0.000000000 | -4.919359000  | -2.496565000 |
| C | 0.000000000 | -7.383727000  | 1.407983000  |
| C | 0.000000000 | -8.617778000  | 0.727441000  |
| C | 0.000000000 | -8.617778000  | -0.727441000 |
| C | 0.000000000 | -7.383727000  | -1.407983000 |
| H | 0.000000000 | -7.384491000  | -2.495432000 |
| H | 0.000000000 | -7.384491000  | 2.495432000  |
| C | 0.000000000 | -9.852169000  | 1.406651000  |
| C | 0.000000000 | -11.068749000 | 0.725669000  |
| C | 0.000000000 | -11.068749000 | -0.725669000 |
| C | 0.000000000 | -9.852169000  | -1.406651000 |
| H | 0.000000000 | -9.852720000  | -2.494205000 |
| H | 0.000000000 | -9.852720000  | 2.494205000  |
| C | 0.000000000 | -12.327811000 | 1.408800000  |
| C | 0.000000000 | -13.506314000 | 0.714656000  |
| H | 0.000000000 | -14.452930000 | 1.246814000  |
| C | 0.000000000 | -13.506314000 | -0.714656000 |
| H | 0.000000000 | -14.452930000 | -1.246814000 |
| C | 0.000000000 | -12.327811000 | -1.408800000 |
| H | 0.000000000 | -12.326093000 | -2.495630000 |
| H | 0.000000000 | -12.326093000 | 2.495630000  |

## Dodecacene

|   |             |              |              |
|---|-------------|--------------|--------------|
| C | 0.000000000 | 11.082077000 | 1.407258000  |
| C | 0.000000000 | 12.296456000 | 0.726447000  |
| C | 0.000000000 | 12.296456000 | -0.726447000 |
| C | 0.000000000 | 11.082077000 | -1.407258000 |
| C | 0.000000000 | 9.845188000  | -0.728050000 |
| C | 0.000000000 | 9.845188000  | 0.728050000  |
| H | 0.000000000 | 11.082579000 | 2.494801000  |
| H | 0.000000000 | 11.082579000 | -2.494801000 |
| C | 0.000000000 | 8.614367000  | 1.408456000  |
| C | 0.000000000 | 7.391119000  | 0.729818000  |
| C | 0.000000000 | 7.391119000  | -0.729818000 |
| C | 0.000000000 | 8.614367000  | -1.408456000 |
| H | 0.000000000 | 8.614986000  | -2.495886000 |
| H | 0.000000000 | 8.614986000  | 2.495886000  |
| C | 0.000000000 | 13.556939000 | 1.409411000  |
| C | 0.000000000 | 14.734414000 | 0.715311000  |

|   |             |               |              |
|---|-------------|---------------|--------------|
| H | 0.000000000 | 15.681312000  | 1.246965000  |
| C | 0.000000000 | 14.734414000  | -0.715311000 |
| H | 0.000000000 | 15.681312000  | -1.246965000 |
| C | 0.000000000 | 13.556939000  | -1.409411000 |
| H | 0.000000000 | 13.555266000  | -2.496235000 |
| H | 0.000000000 | 13.555266000  | 2.496235000  |
| C | 0.000000000 | 6.149233000   | 1.409269000  |
| C | 0.000000000 | 4.933173000   | 0.731905000  |
| C | 0.000000000 | 4.933173000   | -0.731905000 |
| C | 0.000000000 | 6.149233000   | -1.409269000 |
| H | 0.000000000 | 6.149899000   | -2.496703000 |
| H | 0.000000000 | 6.149899000   | 2.496703000  |
| C | 0.000000000 | 3.686761000   | 1.410179000  |
| C | 0.000000000 | 2.469394000   | 0.734490000  |
| C | 0.000000000 | 2.469394000   | -0.734490000 |
| C | 0.000000000 | 3.686761000   | -1.410179000 |
| H | 0.000000000 | 3.687594000   | -2.497622000 |
| H | 0.000000000 | 3.687594000   | 2.497622000  |
| C | 0.000000000 | 1.228173000   | 1.411034000  |
| C | 0.000000000 | 0.000000000   | 0.735884000  |
| C | 0.000000000 | 0.000000000   | -0.735884000 |
| C | 0.000000000 | 1.228173000   | -1.411034000 |
| H | 0.000000000 | 1.228637000   | -2.498471000 |
| H | 0.000000000 | 1.228637000   | 2.498471000  |
| C | 0.000000000 | -1.228173000  | 1.411034000  |
| C | 0.000000000 | -2.469394000  | 0.734490000  |
| C | 0.000000000 | -2.469394000  | -0.734490000 |
| C | 0.000000000 | -1.228173000  | -1.411034000 |
| H | 0.000000000 | -1.228637000  | -2.498471000 |
| H | 0.000000000 | -1.228637000  | 2.498471000  |
| C | 0.000000000 | -3.686761000  | 1.410179000  |
| C | 0.000000000 | -4.933173000  | 0.731905000  |
| C | 0.000000000 | -4.933173000  | -0.731905000 |
| H | 0.000000000 | -3.687594000  | 2.497622000  |
| C | 0.000000000 | -3.686761000  | -1.410179000 |
| H | 0.000000000 | -3.687594000  | -2.497622000 |
| C | 0.000000000 | -6.149233000  | 1.409269000  |
| C | 0.000000000 | -7.391119000  | 0.729818000  |
| C | 0.000000000 | -7.391119000  | -0.729818000 |
| C | 0.000000000 | -6.149233000  | -1.409269000 |
| H | 0.000000000 | -6.149899000  | -2.496703000 |
| H | 0.000000000 | -6.149899000  | 2.496703000  |
| C | 0.000000000 | -8.614367000  | 1.408456000  |
| C | 0.000000000 | -9.845188000  | 0.728050000  |
| C | 0.000000000 | -9.845188000  | -0.728050000 |
| C | 0.000000000 | -8.614367000  | -1.408456000 |
| H | 0.000000000 | -8.614986000  | -2.495886000 |
| H | 0.000000000 | -8.614986000  | 2.495886000  |
| C | 0.000000000 | -11.082077000 | 1.407258000  |
| C | 0.000000000 | -12.296456000 | 0.726447000  |
| C | 0.000000000 | -12.296456000 | -0.726447000 |
| C | 0.000000000 | -11.082077000 | -1.407258000 |
| H | 0.000000000 | -11.082579000 | -2.494801000 |
| H | 0.000000000 | -11.082579000 | 2.494801000  |
| C | 0.000000000 | -13.556939000 | 1.409411000  |
| C | 0.000000000 | -14.734414000 | 0.715311000  |
| H | 0.000000000 | -15.681312000 | 1.246965000  |
| C | 0.000000000 | -14.734414000 | -0.715311000 |
| H | 0.000000000 | -15.681312000 | -1.246965000 |
| C | 0.000000000 | -13.556939000 | -1.409411000 |
| H | 0.000000000 | -13.555266000 | -2.496235000 |
| H | 0.000000000 | -13.555266000 | 2.496235000  |

**Absolute energies in hartrees****For CAS(2,2)**

| CASSCF     | Singlet     | triplet(V)  | triplet(ad) |
|------------|-------------|-------------|-------------|
| Napthalene | -383.38441  | -383.24665  | -383.26936  |
| Anthracene | -536.04293  | -535.94541  | -535.96291  |
| Tetracene  | -688.68155  | -688.60746  | -688.62182  |
| Pentacene  | -841.33302  | -841.27290  | -841.28592  |
| Hexacene   | -993.96786  | -993.92754  | -993.93686  |
| Heptacene  | -1146.61337 | -1146.58385 | -1146.58902 |
| Octacene   | -1299.24731 | -1299.23143 | -1299.23507 |
| Nonacene   | -1451.89188 | -1451.87789 | -1451.88164 |
| Decacene   | -1604.52800 | -1604.52054 | -1604.52478 |
| Undecacene | -1757.17044 | -1757.16272 | -1757.16831 |
| Dodecacene | -1909.80722 | -1909.80271 | -1909.80970 |

| CASPT2     | Singlet     | triplet(V)  | triplet(ad) |
|------------|-------------|-------------|-------------|
| Napthalene | -384.68168  | -384.55890  | -384.57305  |
| Anthracene | -537.85035  | -537.75451  | -537.76765  |
| Tetracene  | -691.01508  | -690.95007  | -690.96023  |
| Pentacene  | -844.17951  | -844.12497  | -844.13404  |
| Hexacene   | -997.34530  | -997.30762  | -997.31364  |
| Heptacene  | -1150.50872 | -1150.47927 | -1150.48107 |
| Octacene   | -1303.67513 | -1303.65287 | -1303.65343 |
| Nonacene   | -1456.83681 | -1456.81874 | -1456.81848 |
| Decacene   | -1610.00377 | -1609.98748 | -1609.98718 |
| Undecacene | -1763.16512 | -1763.15176 | -1763.15100 |
| Dodecacene | -1916.33239 | -1916.31851 | -1916.31795 |

| tPBE       | Singlet     | triplet(V)  | triplet(ad) |
|------------|-------------|-------------|-------------|
| Napthalene | -385.34215  | -385.22345  | -385.23633  |
| Anthracene | -538.76306  | -538.66810  | -538.68056  |
| Tetracene  | -692.18702  | -692.12778  | -692.13636  |
| Pentacene  | -845.60431  | -845.55449  | -845.56218  |
| Hexacene   | -999.02844  | -998.99703  | -999.00166  |
| Heptacene  | -1152.44466 | -1152.42211 | -1152.42291 |
| Octacene   | -1305.86949 | -1305.85412 | -1305.85395 |
| Nonacene   | -1459.28399 | -1459.27467 | -1459.27355 |
| Decacene   | -1612.71001 | -1612.70148 | -1612.70036 |
| Undecacene | -1766.12452 | -1766.12129 | -1766.11934 |
| Dodecacene | -1919.55137 | -1919.54583 | -1919.54403 |

## For CAS(4,4)

| CASSCF     | Singlet     | triplet(V)  | triplet(ad) |
|------------|-------------|-------------|-------------|
| Napthalene | -383.40398  | -383.25463  | -383.27593  |
| Anthracene | -536.06138  | -535.95035  | -535.96659  |
| Tetracene  | -688.69766  | -688.61400  | -688.62460  |
| Pentacene  | -841.33615  | -841.28384  | -841.29545  |
| Hexacene   | -993.99398  | -993.94730  | -993.95675  |
| Heptacene  | -1146.61616 | -1146.59821 | -1146.60234 |
| Octacene   | -1299.27621 | -1299.25022 | -1299.25386 |
| Nonacene   | -1451.91440 | -1451.89430 | -1451.89699 |
| Decacene   | -1604.55768 | -1604.53876 | -1604.54295 |
| Undecacene | -1757.19593 | -1757.18062 | -1757.18486 |
| Dodecacene | -1909.83285 | -1909.81978 | -1909.82750 |

| CASPT2     | Singlet     | triplet(V)  | triplet(ad) |
|------------|-------------|-------------|-------------|
| Napthalene | -384.68369  | -384.56340  | -384.57542  |
| Anthracene | -537.85003  | -537.75387  | -537.76726  |
| Tetracene  | -691.01554  | -690.94971  | -690.96000  |
| Pentacene  | -844.18331  | -844.13457  | -844.14274  |
| Hexacene   | -997.34697  | -997.30518  | -997.31144  |
| Heptacene  | -1150.51266 | -1150.48607 | -1150.48820 |
| Octacene   | -1303.67479 | -1303.65029 | -1303.65097 |
| Nonacene   | -1456.84012 | -1456.82426 | -1456.82444 |
| Decacene   | -1610.00163 | -1609.98492 | -1609.98465 |
| Undecacene | -1763.16848 | -1763.15659 | -1763.15633 |
| Dodecacene | -1916.33276 | -1916.32575 | -1916.31547 |

| tPBE       | Singlet     | triplet(V)  | triplet(ad) |
|------------|-------------|-------------|-------------|
| Napthalene | -385.33662  | -385.22400  | -385.23686  |
| Anthracene | -538.75703  | -538.66788  | -538.68085  |
| Tetracene  | -692.18109  | -692.12711  | -692.13629  |
| Pentacene  | -845.60450  | -845.56379  | -845.57073  |
| Hexacene   | -999.02092  | -998.98556  | -998.99079  |
| Heptacene  | -1152.44491 | -1152.42599 | -1152.42760 |
| Octacene   | -1305.85877 | -1305.84249 | -1305.84265 |
| Nonacene   | -1459.28019 | -1459.27560 | -1459.27549 |
| Decacene   | -1612.69711 | -1612.68970 | -1612.68885 |
| Undecacene | -1766.12169 | -1766.12039 | -1766.11968 |
| Dodecacene | -1919.54027 | -1919.54869 | -1919.53245 |

**For CAS(8,8)**

| CASSCF     | Singlet     | triplet(V)  | triplet(ad) |
|------------|-------------|-------------|-------------|
| Napthalene | -383.46659  | -383.34608  | -383.35950  |
| Anthracene | -536.09568  | -535.99774  | -536.01438  |
| Tetracene  | -688.73530  | -688.67326  | -688.68986  |
| Pentacene  | -841.36133  | -841.29743  | -841.30748  |
| Hexacene   | -994.02101  | -993.99383  | -994.00486  |
| Heptacene  | -1146.66233 | -1146.65091 | -1146.65600 |
| Octacene   | -1299.30846 | -1299.28774 | -1299.29031 |
| Nonacene   | -1451.96598 | -1451.94740 | -1451.95059 |
| Decacene   | -1604.58741 | -1604.57171 | -1604.57536 |
| Undecacene | -1757.23577 | -1757.21385 | -1757.21927 |
| Dodecacene | -1909.87378 | -1909.85621 | -1909.86316 |

| CASPT2     | Singlet     | triplet(V)  | triplet(ad) |
|------------|-------------|-------------|-------------|
| Napthalene | -384.68084  | -384.56245  | -384.57602  |
| Anthracene | -537.85173  | -537.76562  | -537.77641  |
| Tetracene  | -691.01461  | -690.94541  | -690.95525  |
| Pentacene  | -844.18419  | -844.13889  | -844.14776  |
| Hexacene   | -997.34710  | -997.30177  | -997.30781  |
| Heptacene  | -1150.51076 | -1150.48199 | -1150.48451 |
| Octacene   | -1303.67599 | -1303.65812 | -1303.65920 |
| Nonacene   | -1456.83516 | -1456.81960 | -1456.82008 |
| Decacene   | -1610.00590 | -1609.98738 | -1609.98710 |
| Undecacene | -1763.17167 | -1763.15949 | -1763.16033 |
| Dodecacene | -1916.33501 | -1916.32964 | -1916.31788 |

| tPBE       | Singlet     | triplet(V)  | triplet(ad) |
|------------|-------------|-------------|-------------|
| Napthalene | -385.32260  | -385.20142  | -385.21720  |
| Anthracene | -538.75186  | -538.66910  | -538.67862  |
| Tetracene  | -692.17368  | -692.10599  | -692.11416  |
| Pentacene  | -845.59976  | -845.56211  | -845.57057  |
| Hexacene   | -999.01628  | -998.97418  | -998.97869  |
| Heptacene  | -1152.43525 | -1152.40599 | -1152.40761 |
| Octacene   | -1305.85420 | -1305.84204 | -1305.84265 |
| Nonacene   | -1459.26513 | -1459.25431 | -1459.25435 |
| Decacene   | -1612.69375 | -1612.68282 | -1612.68223 |
| Undecacene | -1766.11500 | -1766.11364 | -1766.11330 |
| Dodecacene | -1919.53320 | -1919.54177 | -1919.52469 |



## For FP-1

| GASSCF     | Singlet     | triplet(V)  | triplet(ad) |
|------------|-------------|-------------|-------------|
| Napthalene | -383.42852  | -383.29303  | -383.31940  |
| Anthracene | -536.16416  | -536.05822  | -536.07627  |
| Tetracene  | -688.83438  | -688.76070  | -688.77688  |
| Pentacene  | -841.52058  | -841.45185  | -841.46669  |
| Hexacene   | -994.18405  | -994.14006  | -994.15141  |
| Heptacene  | -1146.85961 | -1146.82431 | -1146.83045 |
| Octacene   | -1299.52062 | -1299.50173 | -1299.50612 |
| Nonacene   | -1452.19170 | -1452.17439 | -1452.17850 |
| Decacene   | -1604.85446 | -1604.84384 | -1604.84851 |
| Undecacene | -1757.52079 | -1757.51051 | -1757.51645 |
| Dodecacene | -1910.18297 | -1910.17512 | -1910.18267 |

| AGASPT2    | Singlet    | triplet(V) | triplet(ad) |
|------------|------------|------------|-------------|
| Napthalene | -384.64265 | -384.51386 | -384.53539  |
| Anthracene | -537.82765 | -537.73169 | -537.74447  |
| Tetracene  | -690.98007 | -690.90967 | -690.92185  |
| Pentacene  | -844.14176 | -844.08079 | -844.09170  |

| MC-PDFT    | Singlet     | triplet(V)  | triplet(ad) |
|------------|-------------|-------------|-------------|
| Napthalene | -385.32883  | -385.20518  | -385.21634  |
| Anthracene | -538.74599  | -538.66423  | -538.67341  |
| Tetracene  | -692.16847  | -692.10632  | -692.11488  |
| Pentacene  | -845.59172  | -845.54438  | -845.55138  |
| Hexacene   | -999.01503  | -998.97854  | -998.98356  |
| Heptacene  | -1152.43957 | -1152.41201 | -1152.41330 |
| Octacene   | -1305.86143 | -1305.84163 | -1305.84169 |
| Nonacene   | -1459.28711 | -1459.26891 | -1459.26831 |
| Decacene   | -1612.70812 | -1612.69586 | -1612.69498 |
| Undecacene | -1766.13513 | -1766.12130 | -1766.12008 |
| Dodecacene | -1919.55678 | -1919.54735 | -1919.54601 |

**For DFP-1**

| GASSCF     | Singlet     | triplet(V)  | triplet(ad) |
|------------|-------------|-------------|-------------|
| Napthalene | -383.46536  | -383.35270  | -383.36636  |
| Anthracene | -536.15790  | -536.04772  | -536.06574  |
| Tetracene  | -688.81218  | -688.74444  | -688.75988  |
| Pentacene  | -841.49863  | -841.43850  | -841.45152  |
| Hexacene   | -994.16986  | -994.13407  | -994.14494  |
| Heptacene  | -1146.84574 | -1146.81211 | -1146.81764 |
| Octacene   | -1299.52880 | -1299.49801 | -1299.50221 |
| Nonacene   | -1452.18885 | -1452.16498 | -1452.16852 |
| Decacene   | -1604.86611 | -1604.84218 | -1604.84668 |
| Undecacene | -1757.52475 | -1757.50377 | -1757.50895 |
| Dodecacene | -1910.19664 | -1910.17509 | -1910.18249 |

| tPBE       | Singlet     | triplet(V)  | triplet(ad) |
|------------|-------------|-------------|-------------|
| Napthalene | -385.31312  | -385.19052  | -385.21335  |
| Anthracene | -538.73815  | -538.66151  | -538.67107  |
| Tetracene  | -692.16532  | -692.10665  | -692.11292  |
| Pentacene  | -845.58346  | -845.53586  | -845.54382  |
| Hexacene   | -999.00880  | -998.96359  | -998.96922  |
| Heptacene  | -1152.42549 | -1152.40314 | -1152.40483 |
| Octacene   | -1305.84635 | -1305.82608 | -1305.82654 |
| Nonacene   | -1459.26961 | -1459.25954 | -1459.25954 |
| Decacene   | -1612.69039 | -1612.67987 | -1612.67945 |
| Undecacene | -1766.11727 | -1766.11159 | -1766.11130 |
| Dodecacene | -1919.53805 | -1919.53108 | -1919.53031 |

| AGASPT2    | Singlet    | triplet(V) | triplet(ad) |
|------------|------------|------------|-------------|
| Napthalene | -384.65655 | -384.53710 | -384.55141  |
| Anthracene | -537.81720 | -537.72177 | -537.73452  |
| Tetracene  | -690.96388 | -690.89766 | -690.90578  |

## For WFT-1

| GASSCF     | Singlet     | triplet(V)  | triplet(ad) |
|------------|-------------|-------------|-------------|
| Napthalene | -383.46994  | -383.35492  | -383.36801  |
| Anthracene | -536.16247  | -536.05122  | -536.06834  |
| Tetracene  | -688.81351  | -688.74654  | -688.76264  |
| Pentacene  | -841.51670  | -841.44495  | -841.45741  |
| Hexacene   | -994.18889  | -994.13882  | -994.14939  |
| Heptacene  | -1146.85741 | -1146.81828 | -1146.82354 |
| Octacene   | -1299.53553 | -1299.50290 | -1299.50686 |
| Nonacene   | -1452.19433 | -1452.17114 | -1452.17442 |
| Decacene   | -1604.87084 | -1604.84710 | -1604.85132 |
| Undecacene | -1757.52981 | -1757.51001 | -1757.51478 |
| Dodecacene | -1910.20070 | -1910.17998 | -1910.18703 |

| tPBE       | Singlet     | triplet(V)  | triplet(ad) |
|------------|-------------|-------------|-------------|
| Napthalene | -385.31436  | -385.19100  | -385.21389  |
| Anthracene | -538.73953  | -538.66319  | -538.67225  |
| Tetracene  | -692.16565  | -692.10851  | -692.11363  |
| Pentacene  | -845.58234  | -845.53712  | -845.54519  |
| Hexacene   | -999.00603  | -998.96733  | -998.97243  |
| Heptacene  | -1152.42854 | -1152.40485 | -1152.40648 |
| Octacene   | -1305.85116 | -1305.83031 | -1305.83033 |
| Nonacene   | -1459.27190 | -1459.26180 | -1459.26156 |
| Decacene   | -1612.69512 | -1612.68444 | -1612.68349 |
| Undecacene | -1766.11950 | -1766.11445 | -1766.11362 |
| Dodecacene | -1919.54218 | -1919.53586 | -1919.53443 |

| AGASPT2    | Singlet    | triplet(V) | triplet(ad) |
|------------|------------|------------|-------------|
| Napthalene | -384.66015 | -384.53869 | -384.55278  |
| Anthracene | -537.82078 | -537.72510 | -537.73693  |
| Tetracene  | -690.96526 | -690.90002 | -690.90805  |

## For WFP-3

| GASSCF     | Singlet     | triplet(V)  | triplet(ad) |
|------------|-------------|-------------|-------------|
| Napthalene | -383.49481  | -383.37872  | -383.39382  |
| Anthracene | -536.18471  | -536.09245  | -536.10657  |
| Tetracene  | -688.86592  | -688.79335  | -688.80562  |
| Pentacene  | -841.54504  | -841.49092  | -841.50183  |
| Hexacene   | -994.22011  | -994.17935  | -994.18764  |
| Heptacene  | -1146.89068 | -1146.86368 | -1146.86752 |
| Octacene   | -1299.56060 | -1299.54082 | -1299.54349 |
| Nonacene   | -1452.22993 | -1452.21426 | -1452.21656 |
| Decacene   | -1604.89680 | -1604.88381 | -1604.88643 |
| Undecacene | -1757.56376 | -1757.55139 | -1757.55492 |

| AGASPT2    | Singlet    | triplet(V) | triplet(ad) |
|------------|------------|------------|-------------|
| Napthalene | -384.67667 | -384.55800 | -384.57190  |
| Anthracene | -537.83968 | -537.75349 | -537.76549  |
| Tetracene  | -690.99908 | -690.93465 | -690.94507  |

| tPBE       | Singlet     | triplet(V)  | triplet(ad) |
|------------|-------------|-------------|-------------|
| Napthalene | -385.31944  | -385.20012  | -385.21628  |
| Anthracene | -538.74220  | -538.66183  | -538.67347  |
| Tetracene  | -692.16680  | -692.11146  | -692.12083  |
| Pentacene  | -845.59017  | -845.55034  | -845.55743  |
| Hexacene   | -999.01368  | -998.98612  | -998.98973  |
| Heptacene  | -1152.43896 | -1152.42209 | -1152.42295 |
| Octacene   | -1305.86155 | -1305.85300 | -1305.85142 |
| Nonacene   | -1459.28822 | -1459.28124 | -1459.28023 |
| Decacene   | -1612.71628 | -1612.71044 | -1612.70815 |
| Undecacene | -1766.13839 | -1766.13582 | -1766.13351 |

---

<sup>1</sup> B. Hajgat, M. Huzak, and M. S. Deleuze, *J. Phys. Chem. A*, 2011, **115**, 9282–9293.

<sup>2</sup> J. Fosso-Tande, T. Nguyen, G. Gidofalvi, and A. E. DePrince III, *J. Chem. Theory Comput.*, 2016, **12**, 2260-2271.
